# Supplementary material for: Talaromarins A–F: Six New Isocoumarins from Mangrove-Derived Fungus Talaromyces flavus TGGP35
Source: MDPI journal article supplement (doi:10.3390/md20060361), 2022-05-27
Supplement: s1 [file s1]

# **Talaromarins A-F: Six New Isocoumarins from Mangrove-Derived Fungus *Talaromyces flavus* TGGP35**

Jin Cai<sup>1,2,†</sup>, Xiao-Chen Zhu<sup>3,†</sup>, Wei-Nv Zeng<sup>1,2</sup>, Bin Wang<sup>1,2</sup>, You-Ping Luo<sup>1,2</sup>, Jing Liu<sup>1,2</sup>, Min-Jing Chen<sup>1,2</sup>, Gao-Yu Li<sup>1,2</sup>, Guo-Lei Huang<sup>1,2</sup>, Guang-Ying Chen<sup>1,2</sup>, Jing Xu<sup>3,\*</sup> and Cai-Juan Zheng<sup>1,2,\*</sup>

1 Key Laboratory of Tropical Medicinal Resource Chemistry of Ministry of Education, College of Chemistry and Chemical Engineering, Hainan Normal University, Haikou, Hainan, 571158, People's Republic of China; caijin20210207@163.com (J.C.); z17889949296@163.com (W. - N.Z.); 15180328507@163.com (B.W.); lyp188089688692022@163.com (Y.-P.L.); liujing3182799099@163.com (J.L.); cmj19151835730@163.com (M.-J. C.); qqwbma\_999@163.com (G.-Y.L.); 070333@hainnu.edu.cn (G.-L.H.); chgying@163.com (G.-Y.C.)

2 Key Laboratory of Tropical Medicinal Plant Chemistry of Hainan Province, Haikou, Hainan, 571158, People's Republic of China

3 Key Laboratory of Advanced Materials of Tropical Island Resources of Ministry of Education, School of Chemical Engineering and Technology, Hainan University, Haikou 570228, China; zhuxiaochenlucky@163.com (X.-C.Z.)

\* Correspondence: caijuan2002@163.com (C.-J. Z.); happyjing3@163.com (J. X.)

† These authors contributed equally to this work.

## List of contents

**Figure S1.**  $^1\text{H}$  NMR spectrum of **1** in  $\text{CDCl}_3$

**Figure S2.**  $^{13}\text{C}$  NMR spectrum of **1** in  $\text{CDCl}_3$

**Figure S3.** 135-DEPT spectrum of **1** in  $\text{CDCl}_3$

**Figure S4.** HMQC spectrum of **1** in  $\text{CDCl}_3$

**Figure S5.**  $^1\text{H}$ - $^1\text{H}$  COSY spectrum of **1** in  $\text{CDCl}_3$

**Figure S6.** HMBC spectrum of **1** in  $\text{CDCl}_3$

**Figure S7.** HR-ESI-MS spectrum of **1**

**Figure S8.**  $^1\text{H}$  NMR spectrum of **2** in  $\text{CDCl}_3$

**Figure S9.**  $^{13}\text{C}$  NMR spectrum of **2** in  $\text{CDCl}_3$

**Figure S10.** 135-DEPT spectrum of **2** in  $\text{CDCl}_3$

**Figure S11.** HMQC spectrum of **2** in  $\text{CDCl}_3$

**Figure S12.**  $^1\text{H}$ - $^1\text{H}$  COSY spectrum of **2** in  $\text{CDCl}_3$

**Figure S13.** HMBC spectrum of **2** in  $\text{CDCl}_3$

**Figure S14.** HR-ESI-MS spectrum of **2**

**Figure S15.**  $^1\text{H}$  NMR spectrum of **3** in  $\text{CDCl}_3$

**Figure S16.**  $^{13}\text{C}$  NMR spectrum of **3** in  $\text{CDCl}_3$

**Figure S17.** 135-DEPT spectrum of **3** in  $\text{CDCl}_3$

**Figure S18.** HMQC spectrum of **3** in  $\text{CDCl}_3$

**Figure S19.**  $^1\text{H}$ - $^1\text{H}$  COSY spectrum of **3** in  $\text{CDCl}_3$

**Figure S20.** HMBC spectrum of **3** in  $\text{CDCl}_3$

**Figure S21.** HR-ESI-MS spectrum of **3**

**Figure S22.**  $^1\text{H}$  NMR spectrum of **4** in  $\text{CDCl}_3$

**Figure S23.**  $^{13}\text{C}$  NMR spectrum of **4** in  $\text{CDCl}_3$

**Figure S24.** 135-DEPT spectrum of **4** in  $\text{CDCl}_3$

**Figure S25.** HMQC spectrum of **4** in  $\text{CDCl}_3$

**Figure S26.**  $^1\text{H}$ - $^1\text{H}$  COSY spectrum of **4** in  $\text{CDCl}_3$

**Figure S27.** HMBC spectrum of **4** in  $\text{CDCl}_3$

**Figure S28.** HR-ESI-MS spectrum of **4**

**Figure S29.**  $^1\text{H}$  NMR spectrum of **5** in  $\text{CDCl}_3$

**Figure S30.**  $^{13}\text{C}$  NMR spectrum of **5** in  $\text{CDCl}_3$

**Figure S31.** 135-DEPT spectrum of **5** in  $\text{CDCl}_3$

**Figure S32.** HMQC spectrum of **5** in  $\text{CDCl}_3$

**Figure S33.**  $^1\text{H}$ - $^1\text{H}$  COSY spectrum of **5** in  $\text{CDCl}_3$

**Figure S34.** HMBC spectrum of **5** in  $\text{CDCl}_3$

**Figure S35.** HR-ESI-MS spectrum of **5**

**Figure S36.**  $^1\text{H}$  NMR spectrum of **6** in  $\text{CDCl}_3$

**Figure S37.**  $^{13}\text{C}$  NMR spectrum of **6** in  $\text{CDCl}_3$

**Figure S38.** 135-DEPT spectrum of **6** in  $\text{CDCl}_3$

**Figure S39.** HMQC spectrum of **6** in  $\text{CDCl}_3$

**Figure S40.**  $^1\text{H}$ - $^1\text{H}$  COSY spectrum of **6** in  $\text{CDCl}_3$

**Figure S41.** HMBC spectrum of **6** in  $\text{CDCl}_3$

**Figure S42.** HR-ESI-MS spectrum of **6**

Figure S43.  $^1\text{H}$  NMR ( $\text{CDCl}_3$ , 400 MHz) of Hydrolysate of **1a**

Figure S44.  $^{13}\text{C}$  NMR ( $\text{CDCl}_3$ , 400 MHz) of Hydrolysate of **1a**

Figure S45. ESI-MS spectrum of **1a**

Figure S46.  $^1\text{H}$  NMR ( $\text{CDCl}_3$ , 600 MHz) of *S*-MTPA ester of **1a**

Figure S47. ESI-MS spectrum of **1a**

Figure S48.  $^1\text{H}$  NMR ( $\text{CDCl}_3$ , 600 MHz) of *R*-MTPA ester of **1a**

Figure S49. ESI-MS spectrum of **1a**

Figure S50.  $^1\text{H}$  NMR ( $\text{CDCl}_3$ , 600 MHz) of *S*-MTPA ester of **2**

Figure S51. ESI-MS spectrum of **2**

Figure S52.  $^1\text{H}$  NMR ( $\text{CDCl}_3$ , 600 MHz) of *R*-MTPA ester of **2**

Figure S53. ESI-MS spectrum of **2**

Figure S54.  $^1\text{H}$  NMR ( $\text{CDCl}_3$ , 400 MHz) of *S*-MTPA ester of **3**

Figure S55. ESI-MS spectrum of **3**

Figure S56.  $^1\text{H}$  NMR ( $\text{CDCl}_3$ , 400 MHz) of *R*-MTPA ester of **3**

Figure S57. ESI-MS spectrum of **3**

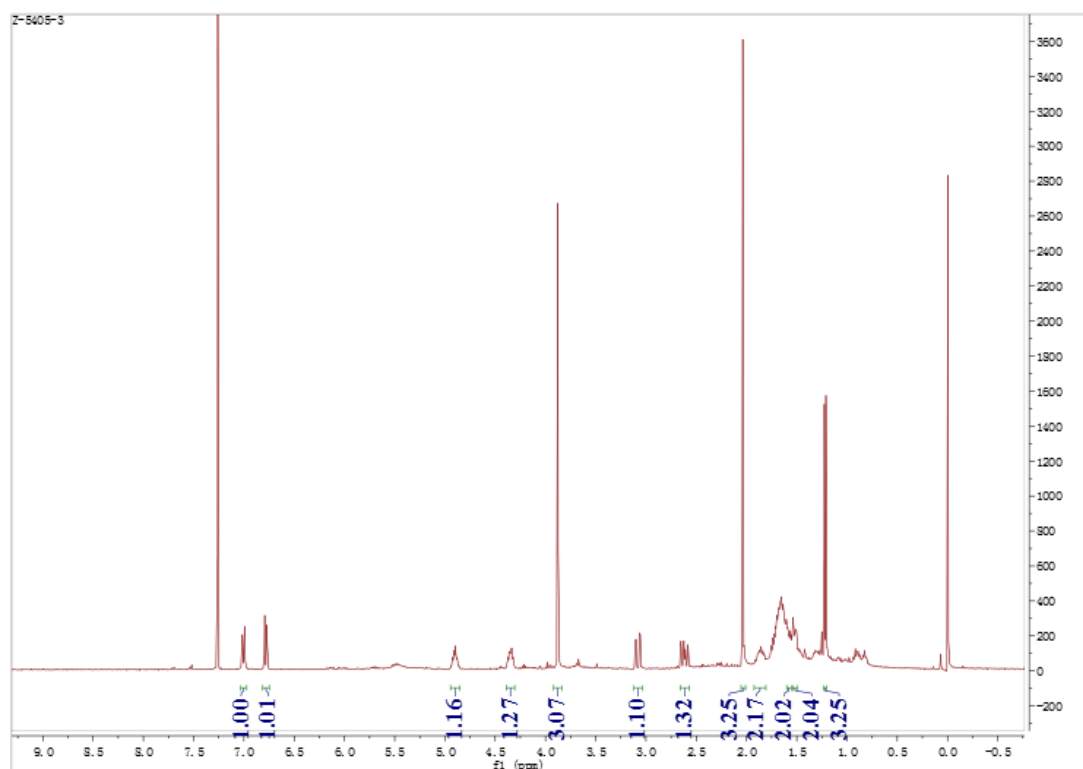

**Figure S1.** <sup>1</sup>H NMR spectrum of **1** in CDCl<sub>3</sub>

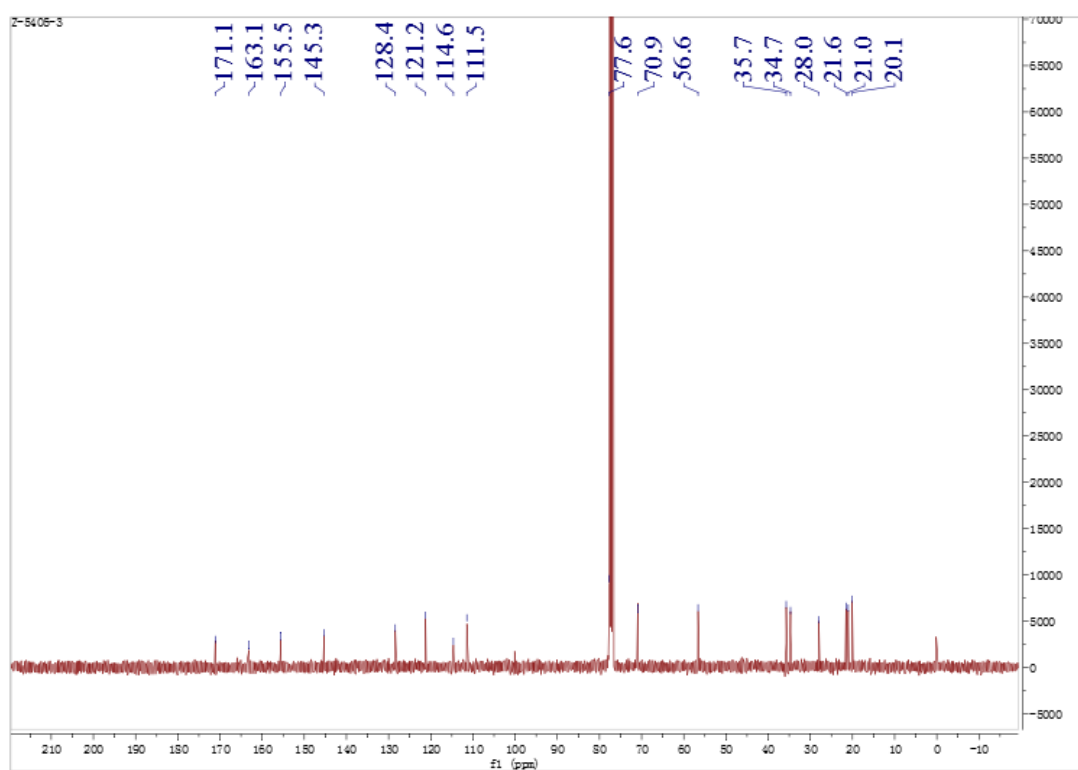

**Figure S2.** <sup>13</sup>C NMR spectrum of **1** in CDCl<sub>3</sub>

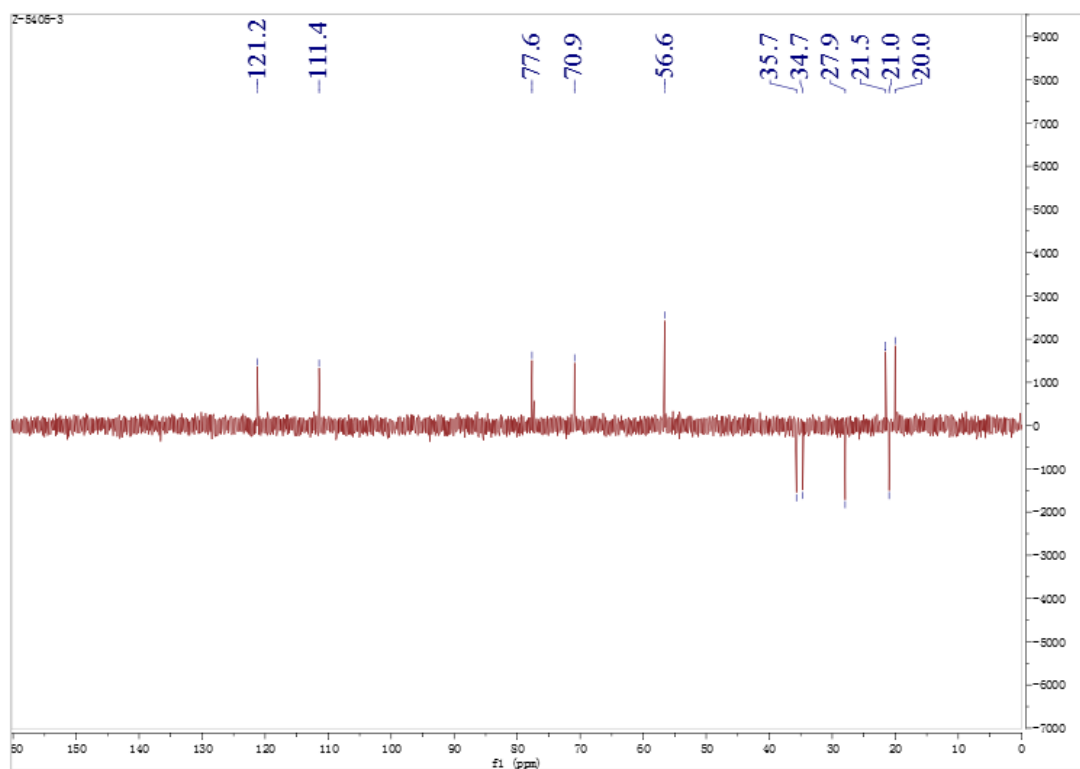

**Figure S3.** 135-DEPT spectrum of **1** in  $\text{CDCl}_3$

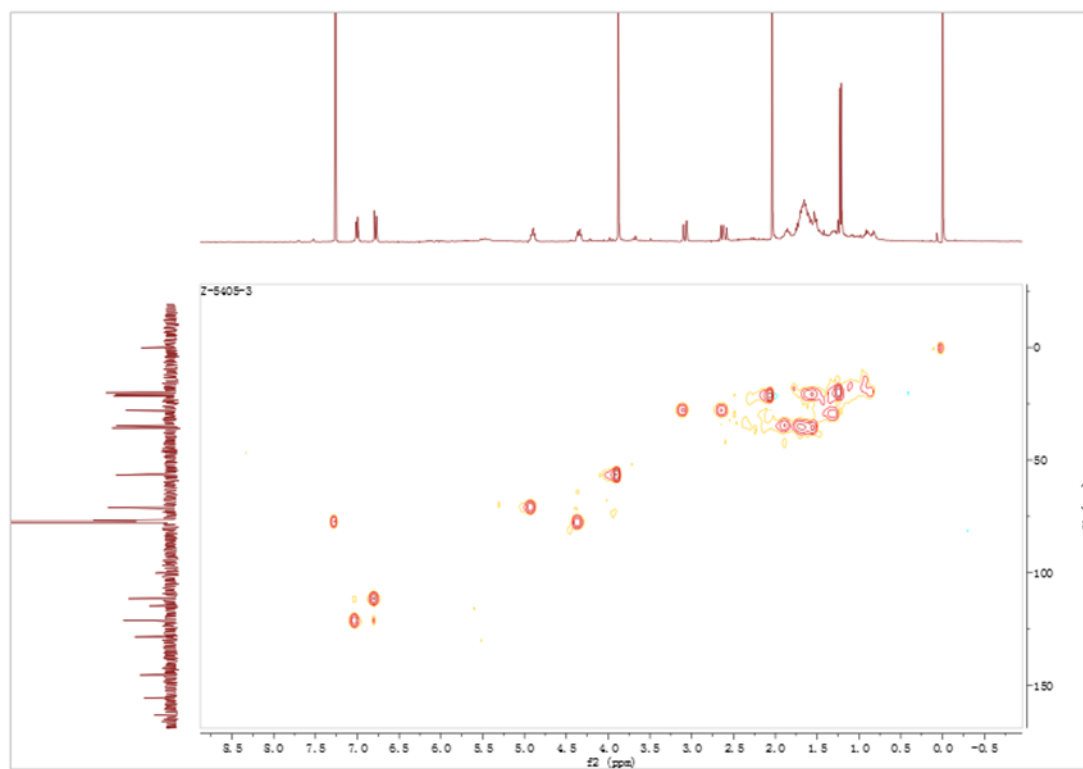

**Figure S4.** HMQC spectrum of **1** in  $\text{CDCl}_3$

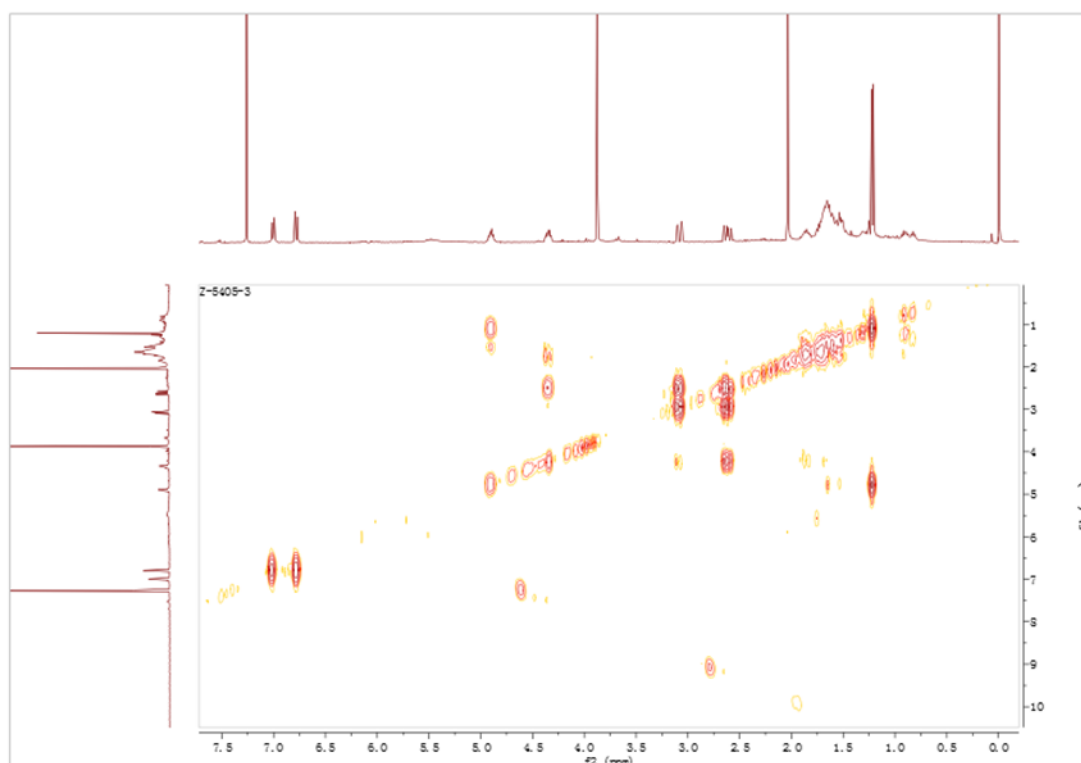

**Figure S5.**  $^1\text{H}$ - $^1\text{H}$  COSY spectrum of **1** in  $\text{CDCl}_3$

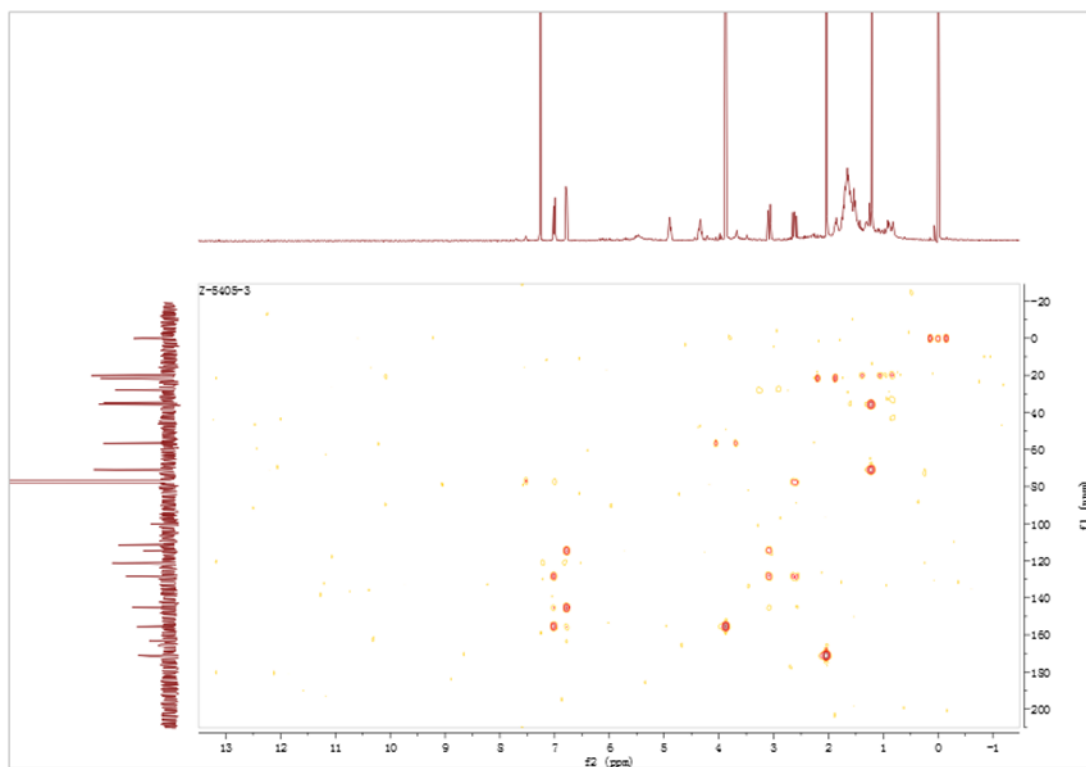

**Figure S6.** HMBC spectrum of **1** in  $\text{CDCl}_3$

20201210-4-Z-5405-3 #1 RT: 0.00 AV: 1 NL: 3.66E6  
T: FTMS + p ESI Full ms [170.0000-430.0000]

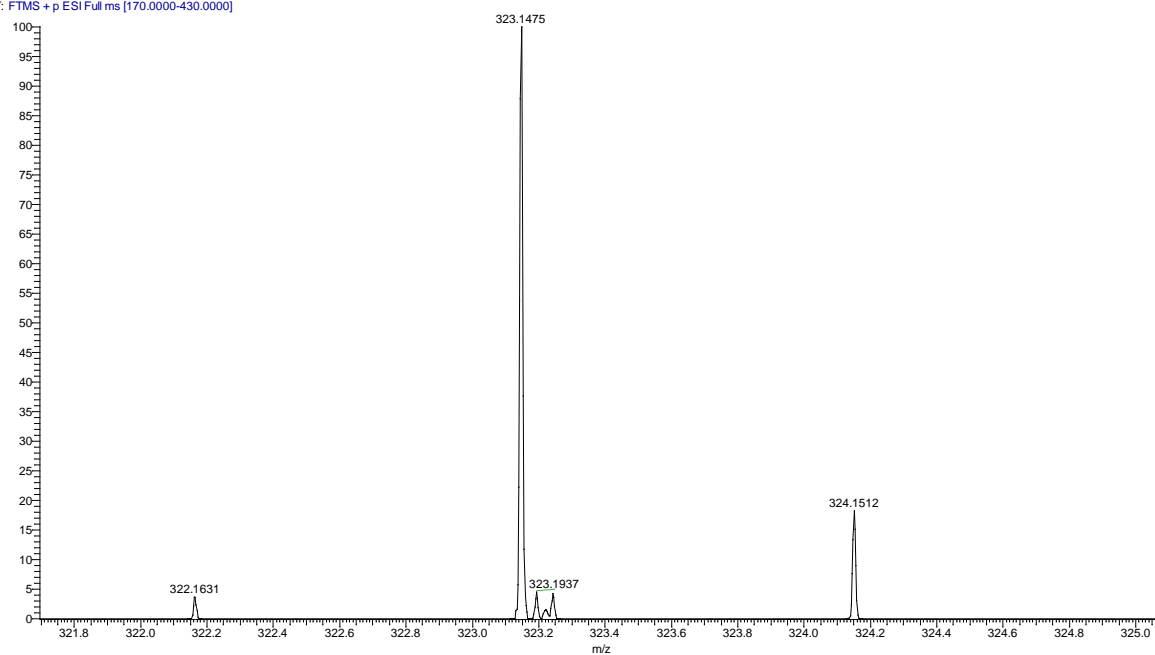

**Figure S7.** HR-ESI-MS spectrum of **1**

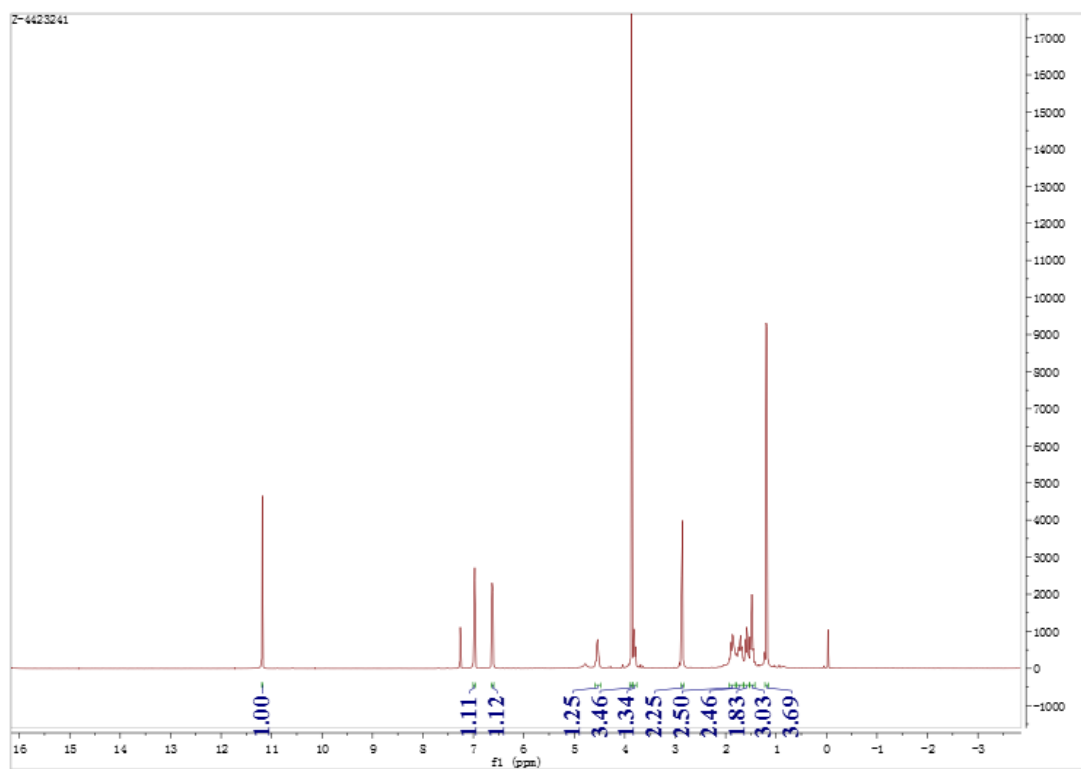

**Figure S8.** <sup>1</sup>H NMR spectrum of **2** in CDCl<sub>3</sub>

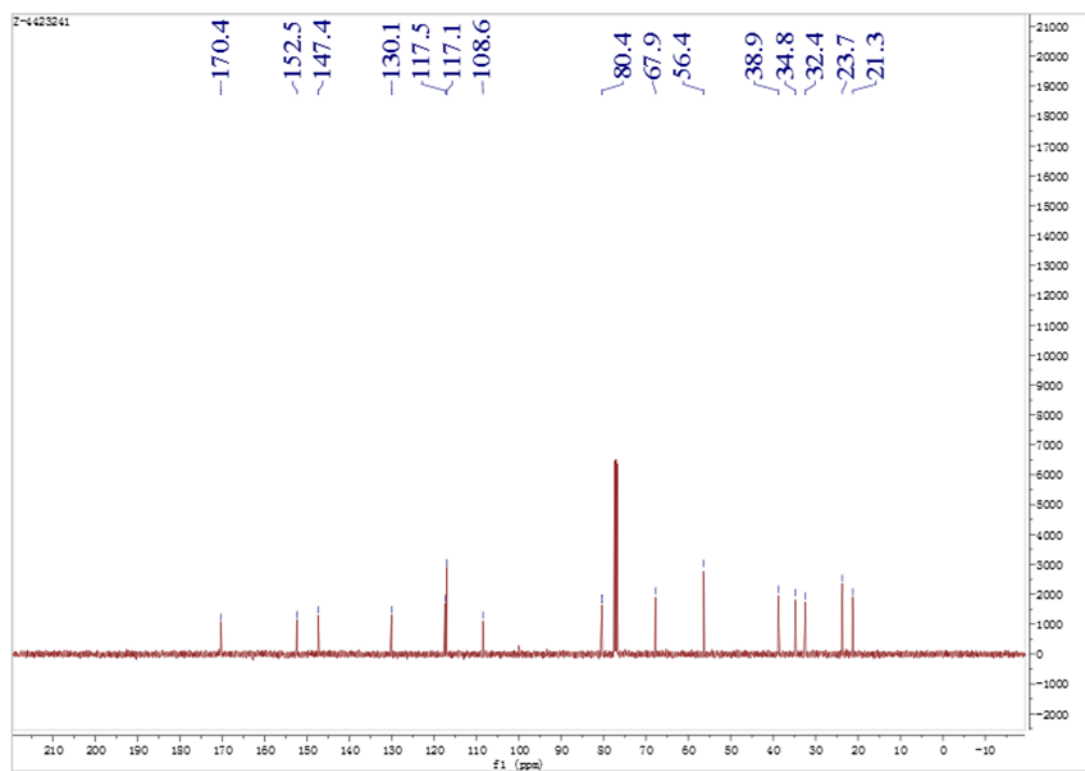

**Figure S9.** <sup>13</sup>C NMR spectrum of **2** in CDCl<sub>3</sub>

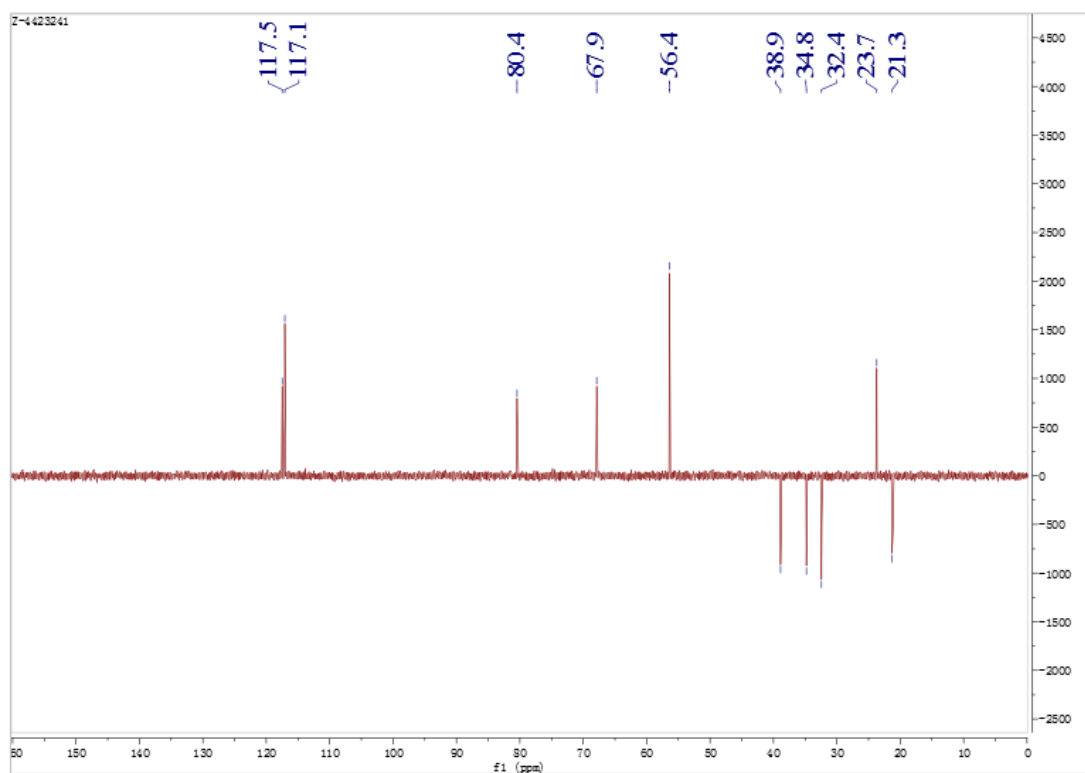

**Figure S10.** <sup>135</sup>-DEPT spectrum of **2** in CDCl<sub>3</sub>



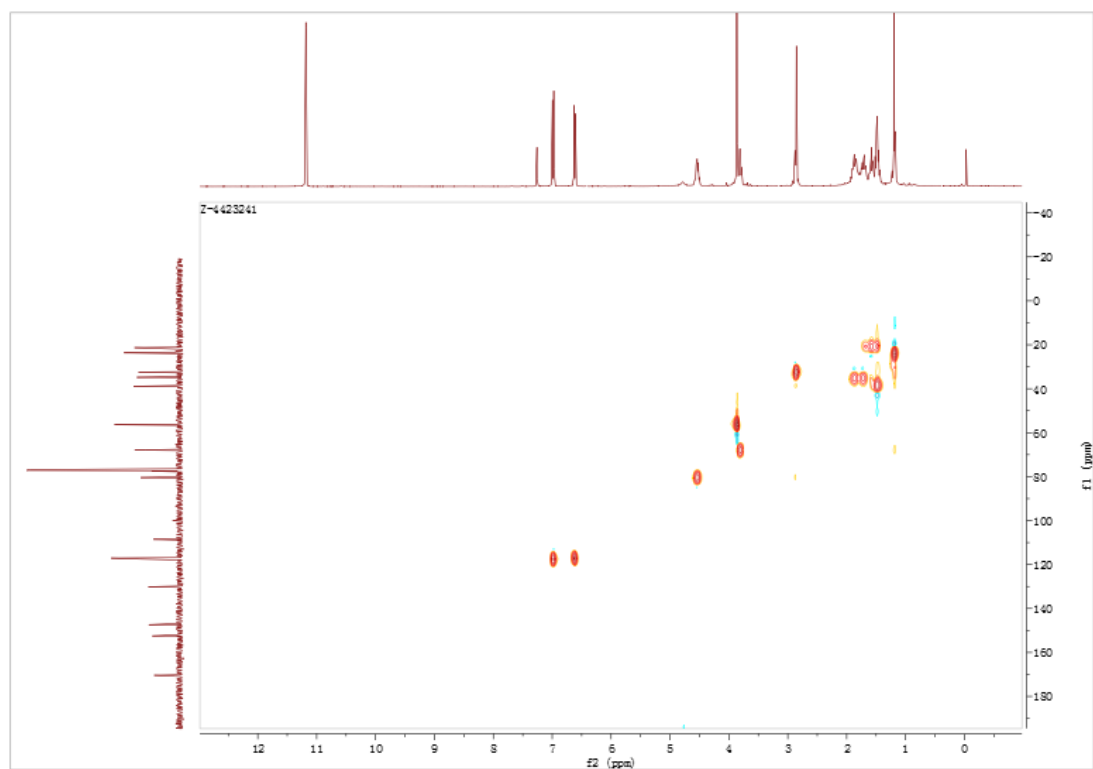

**Figure S11.** HMQC spectrum of **2** in  $\text{CDCl}_3$

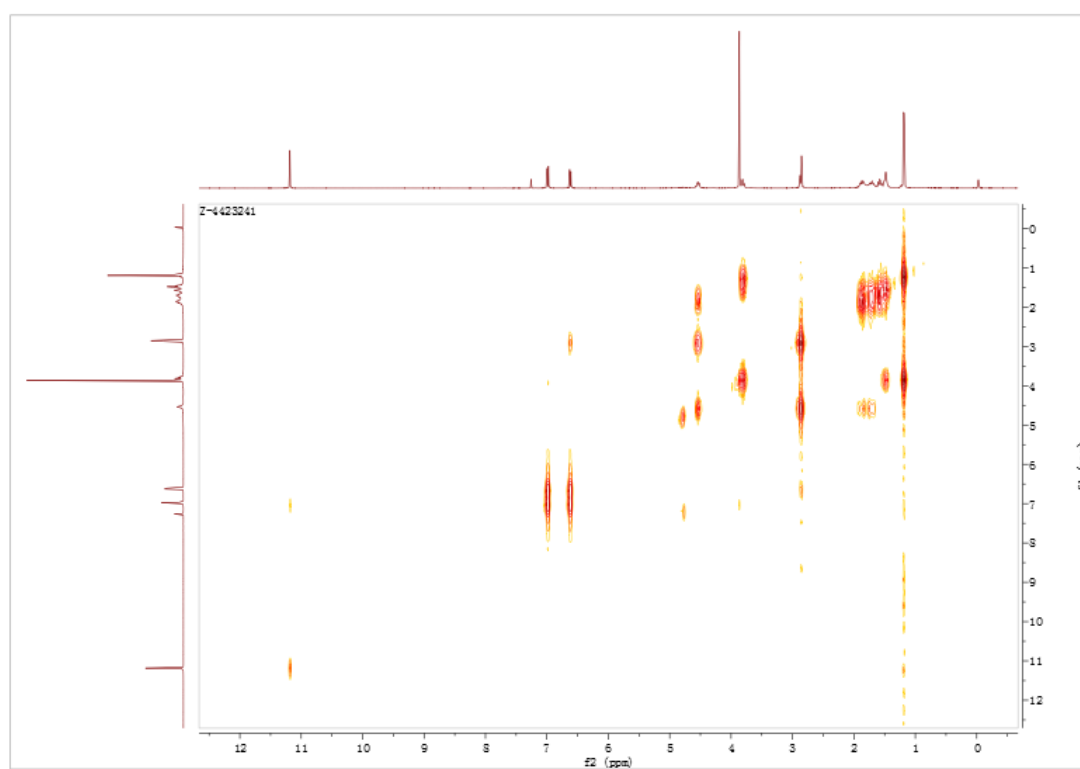

**Figure S12.**  $^1\text{H}$ - $^1\text{H}$  COSY spectrum of **2** in  $\text{CDCl}_3$

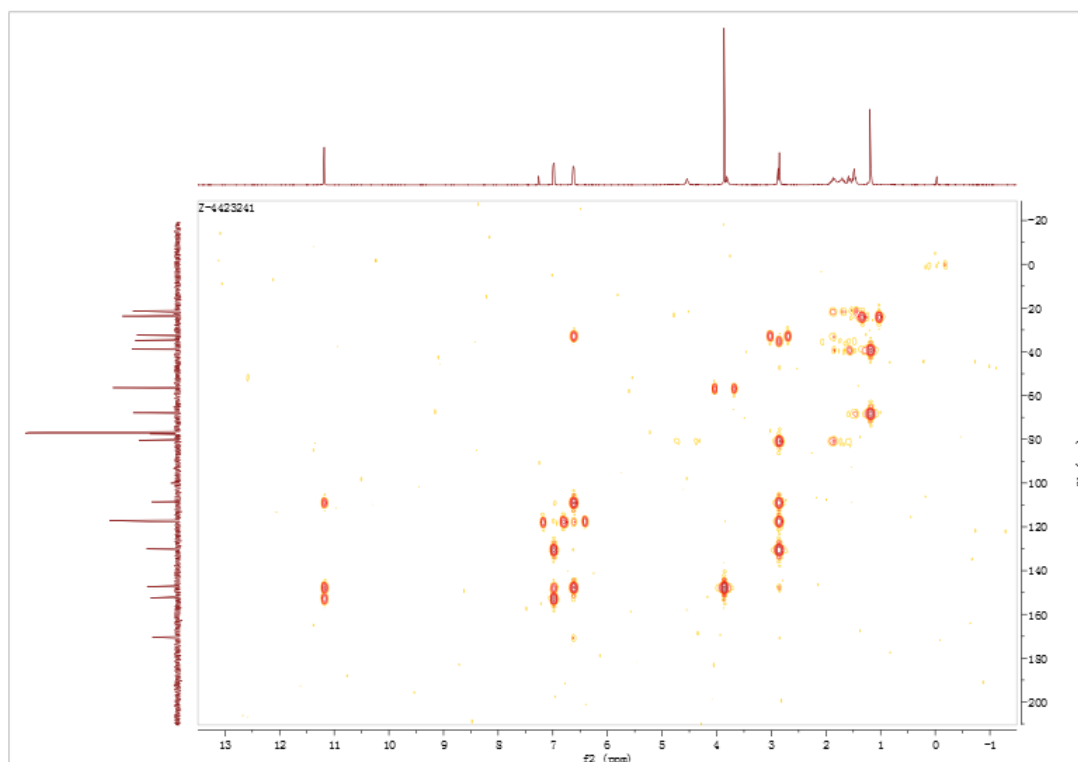

**Figure S13.** HMBC spectrum of **2** in  $\text{CDCl}_3$

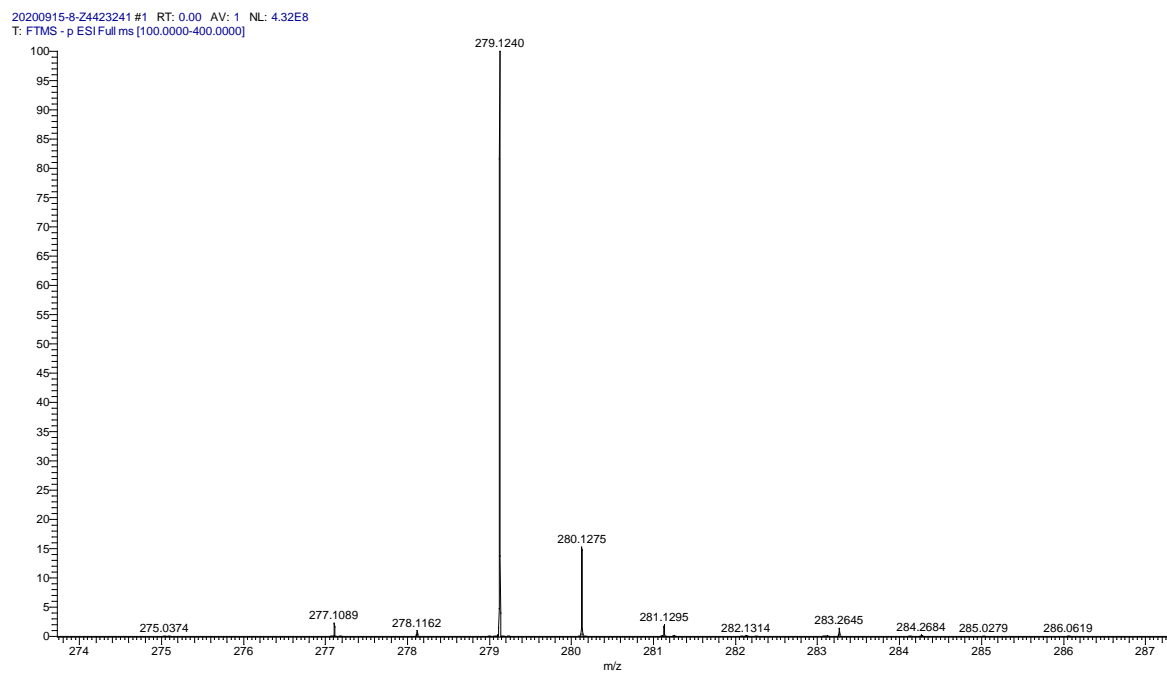

**Figure S14.** HR-ESI-MS spectrum of **2**

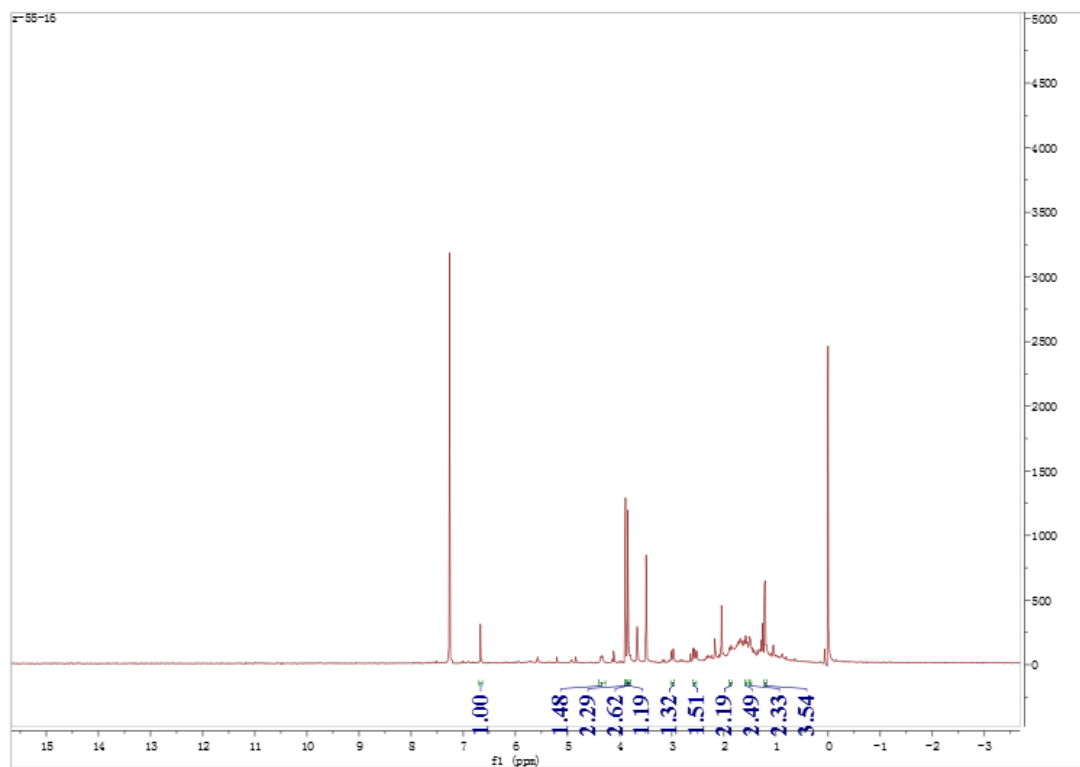

**Figure S15.** <sup>1</sup>H NMR spectrum of **3** in CDCl<sub>3</sub>

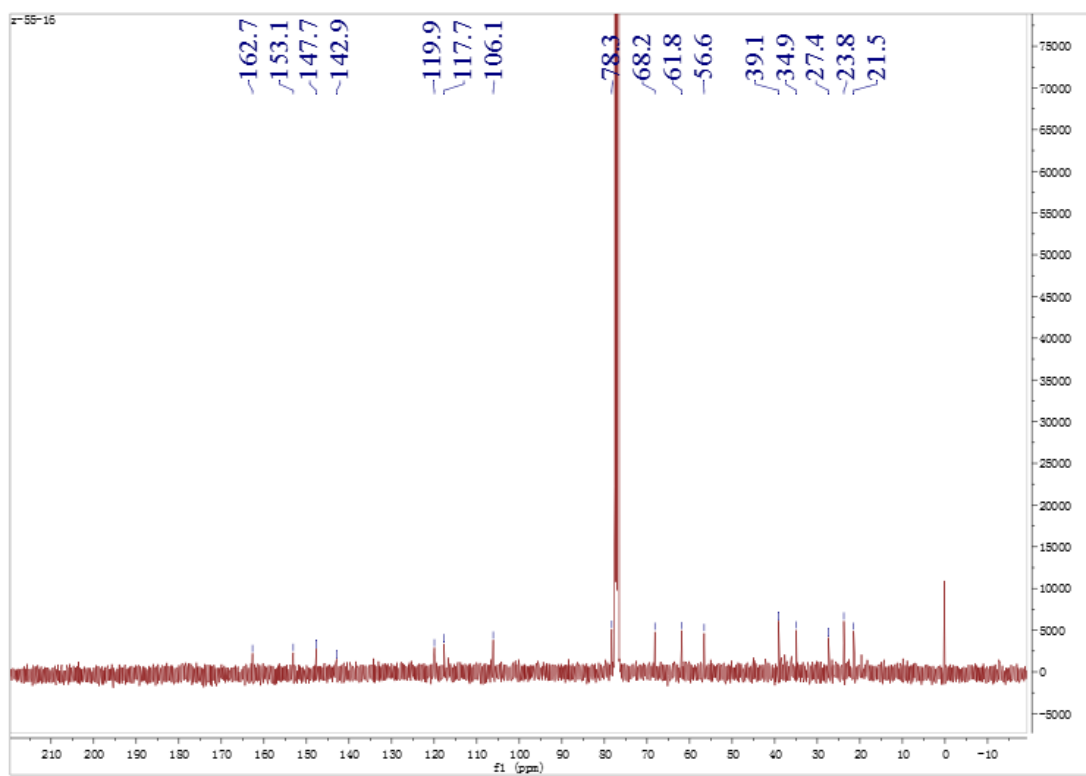

**Figure S16.** <sup>13</sup>C NMR spectrum of **3** in CDCl<sub>3</sub>

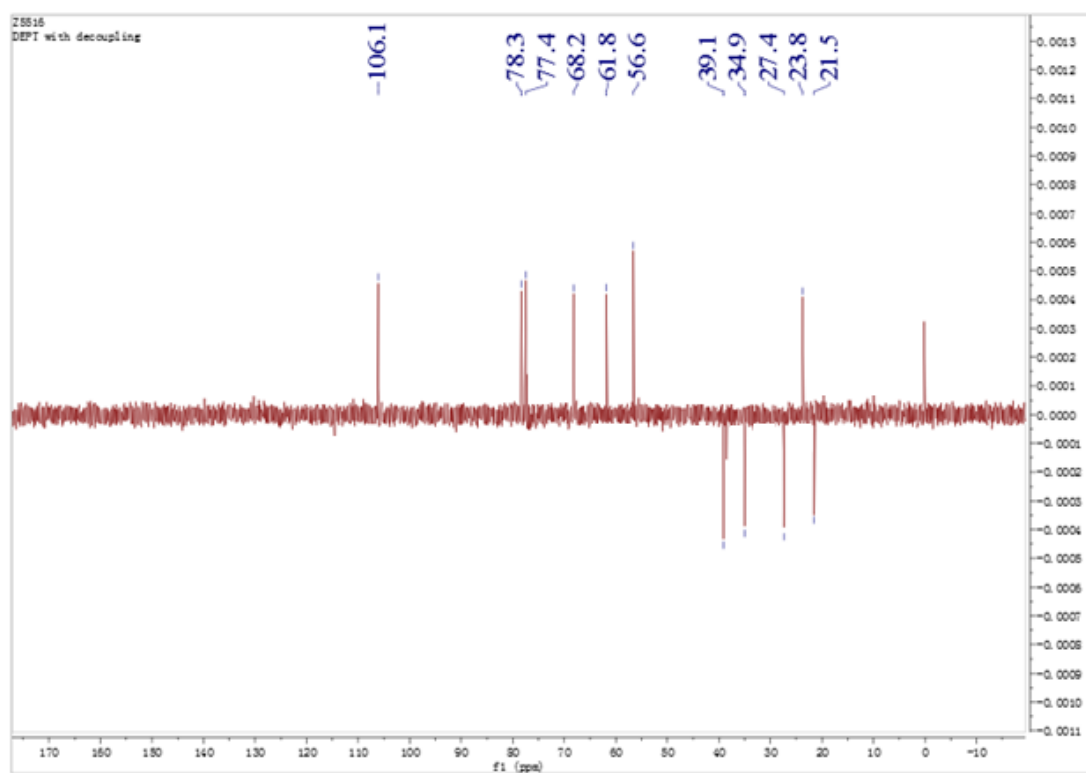

**Figure S17.** 135-DEPT spectrum of **2** in CDCl<sub>3</sub>

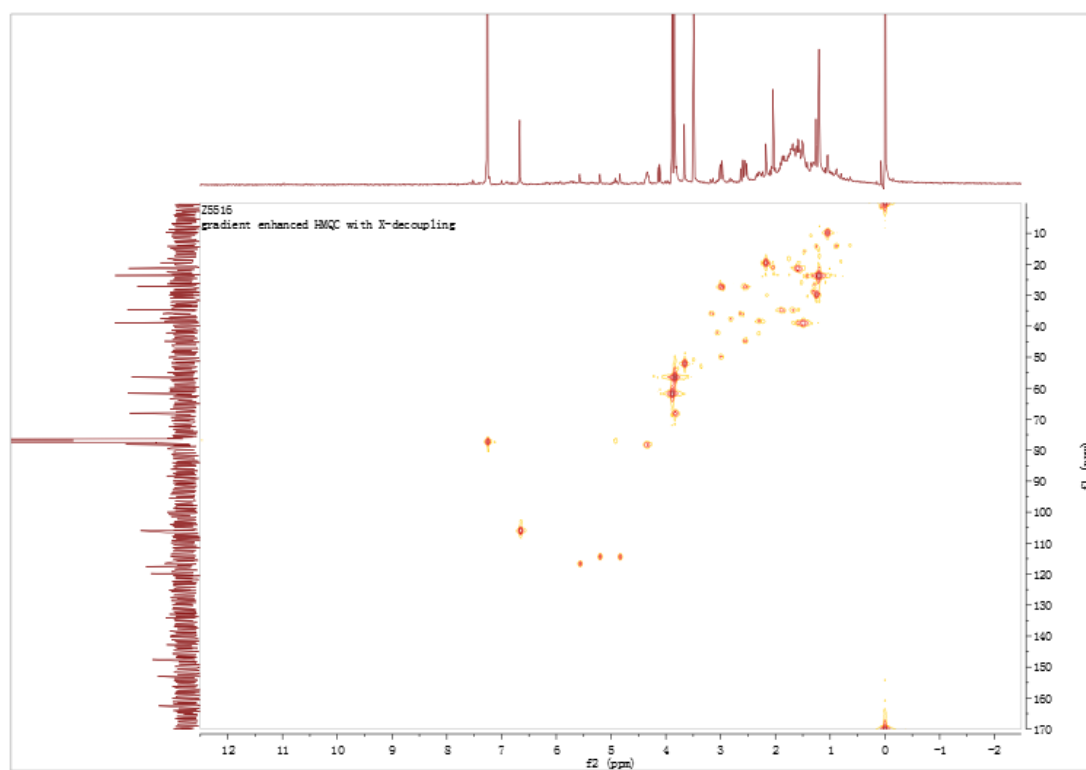

**Figure S18.** HMQC spectrum of **3** in CDCl<sub>3</sub>

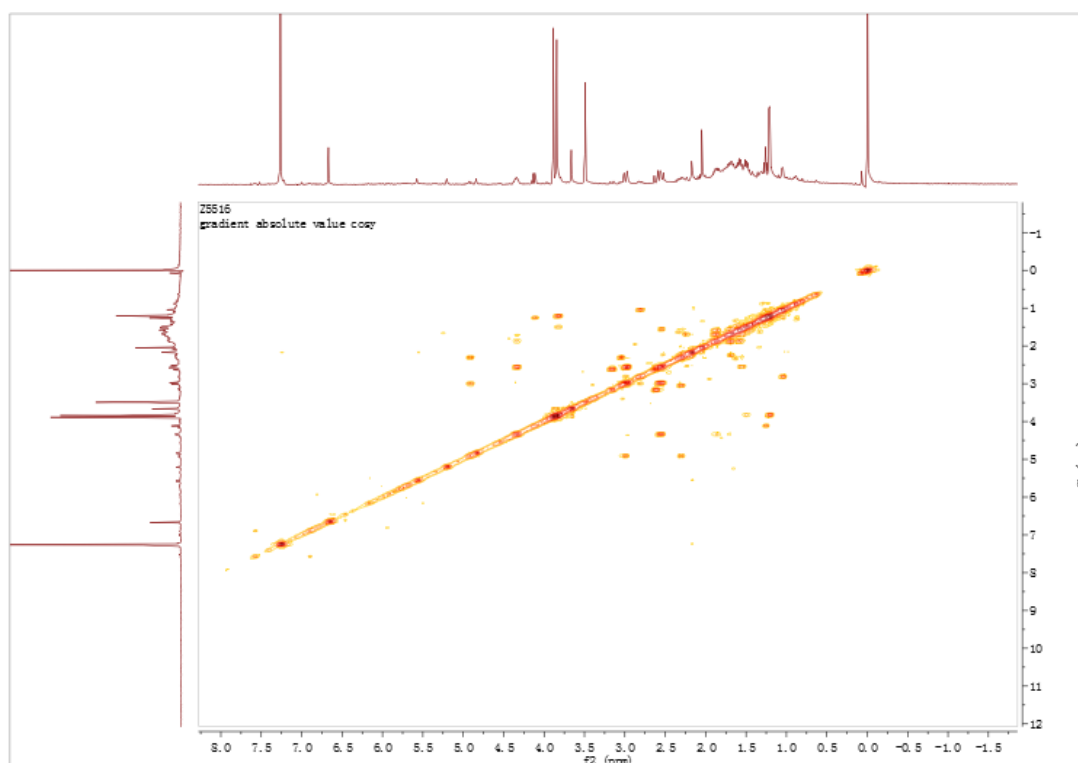

**Figure S19.**  $^1\text{H}$ - $^1\text{H}$  COSY spectrum of **2** in  $\text{CDCl}_3$

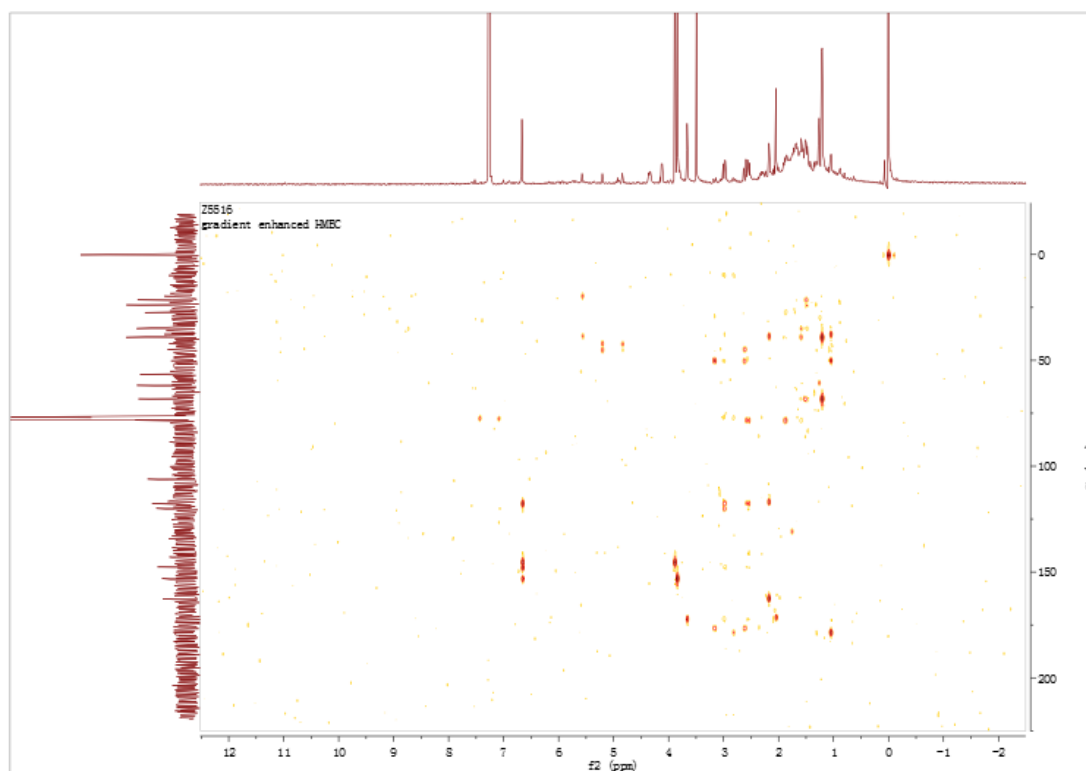

**Figure S20.** HMBC spectrum of **3** in  $\text{CDCl}_3$

20200915-16-Z-55-16 #1 RT: 0.00 AV: 1 NL: 9.79E7  
T: FTMS + p ESI Full ms [200.0000-600.0000]

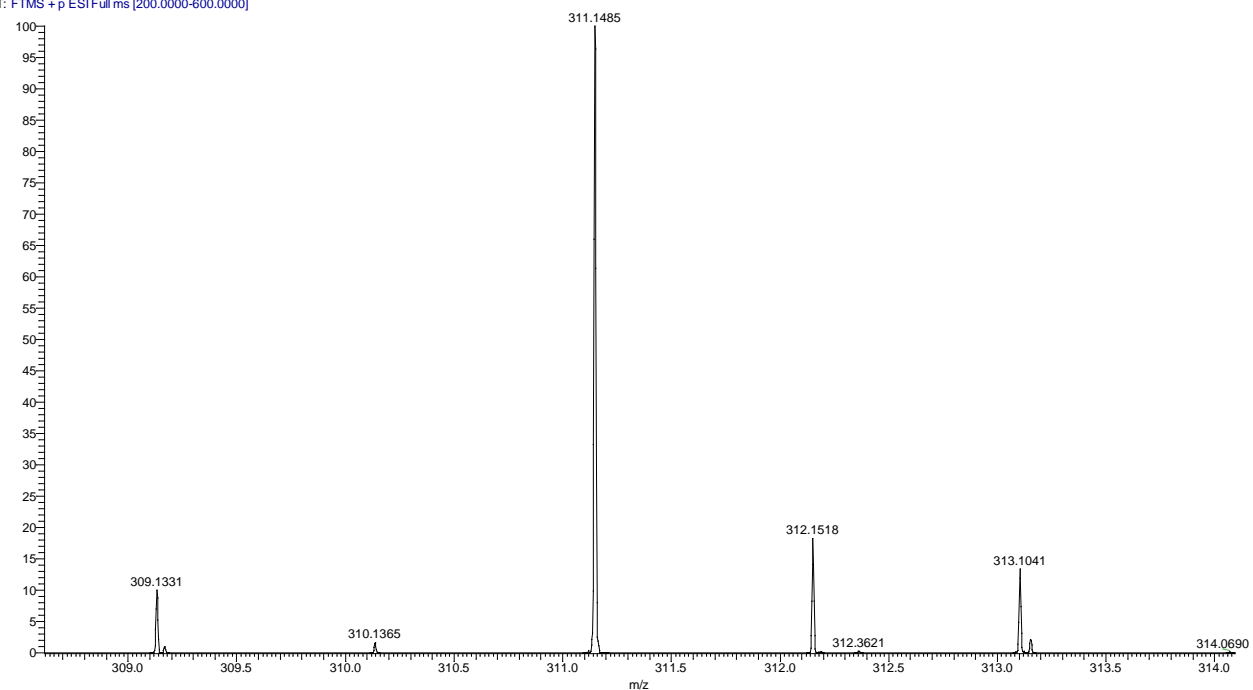

**Figure S21.** HR-ESI-MS spectrum of **3**

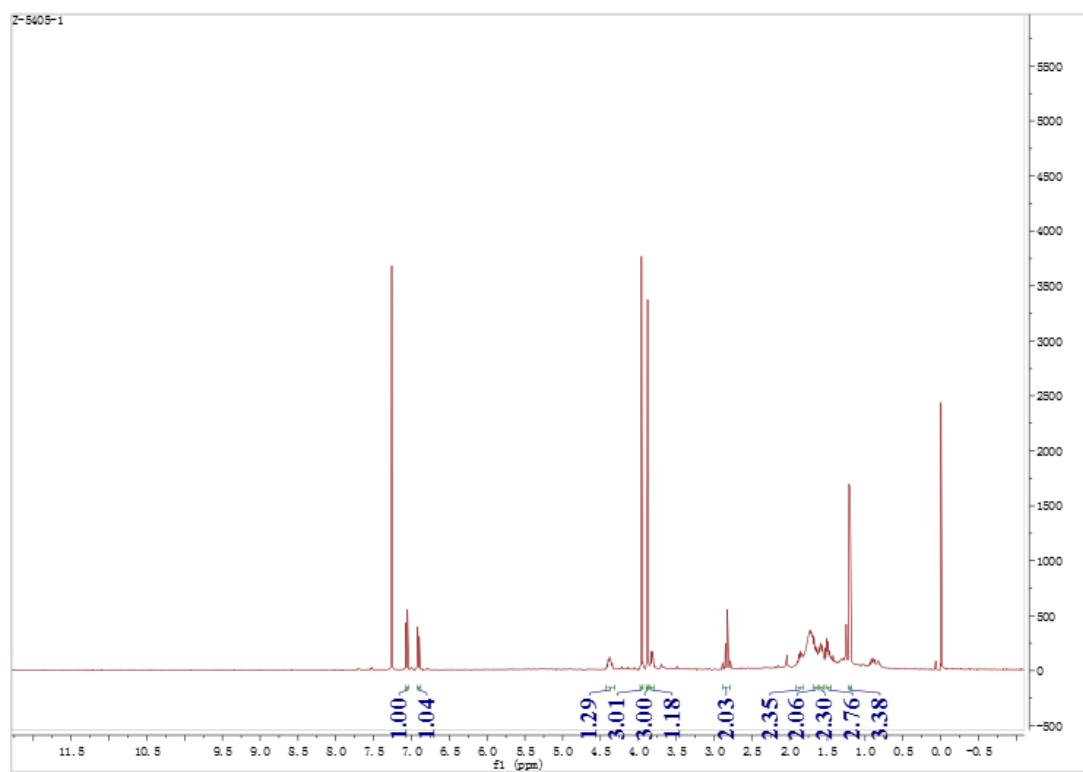

**Figure S22.**  $^1\text{H}$  NMR spectrum of **4** in  $\text{CDCl}_3$

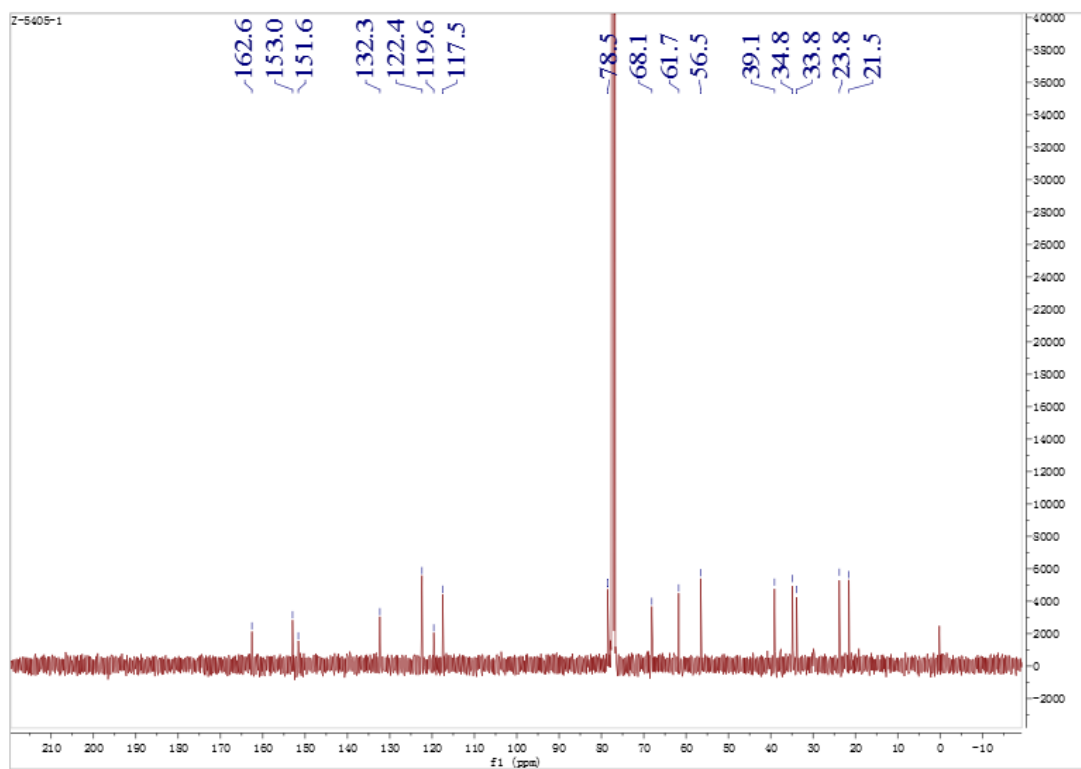

**Figure S23.** <sup>13</sup>C NMR spectrum of **4** in CDCl<sub>3</sub>

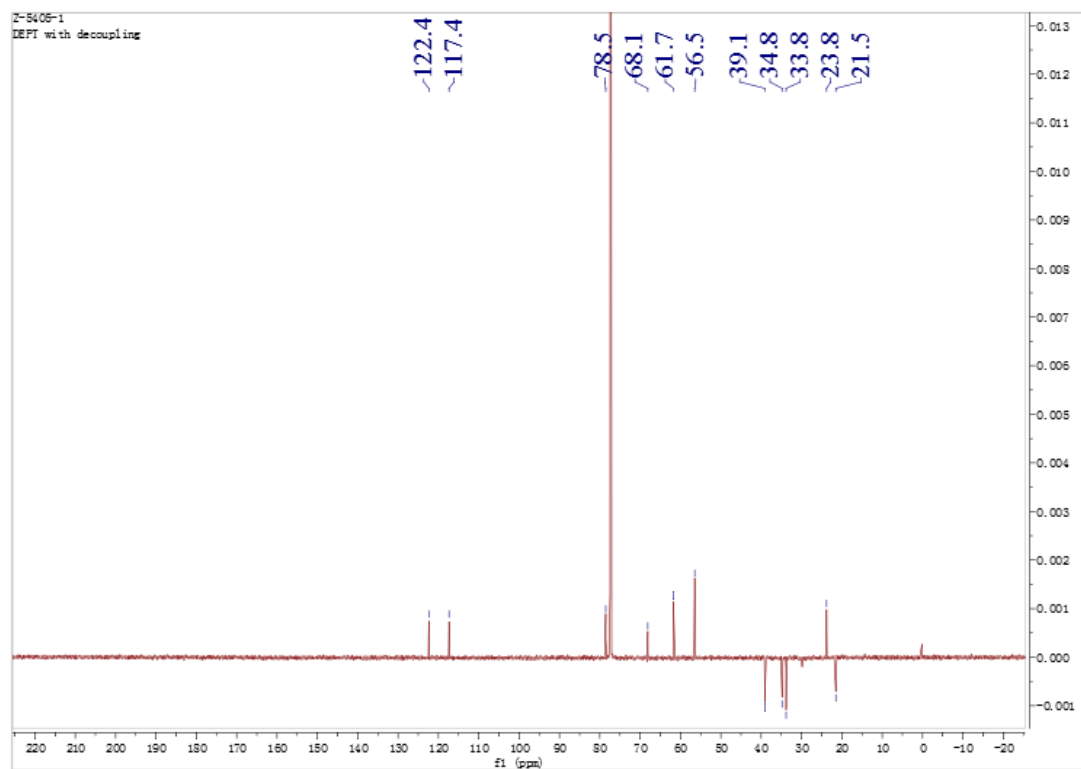

**Figure S24.** <sup>135</sup>-DEPT spectrum of **4** in CDCl<sub>3</sub>

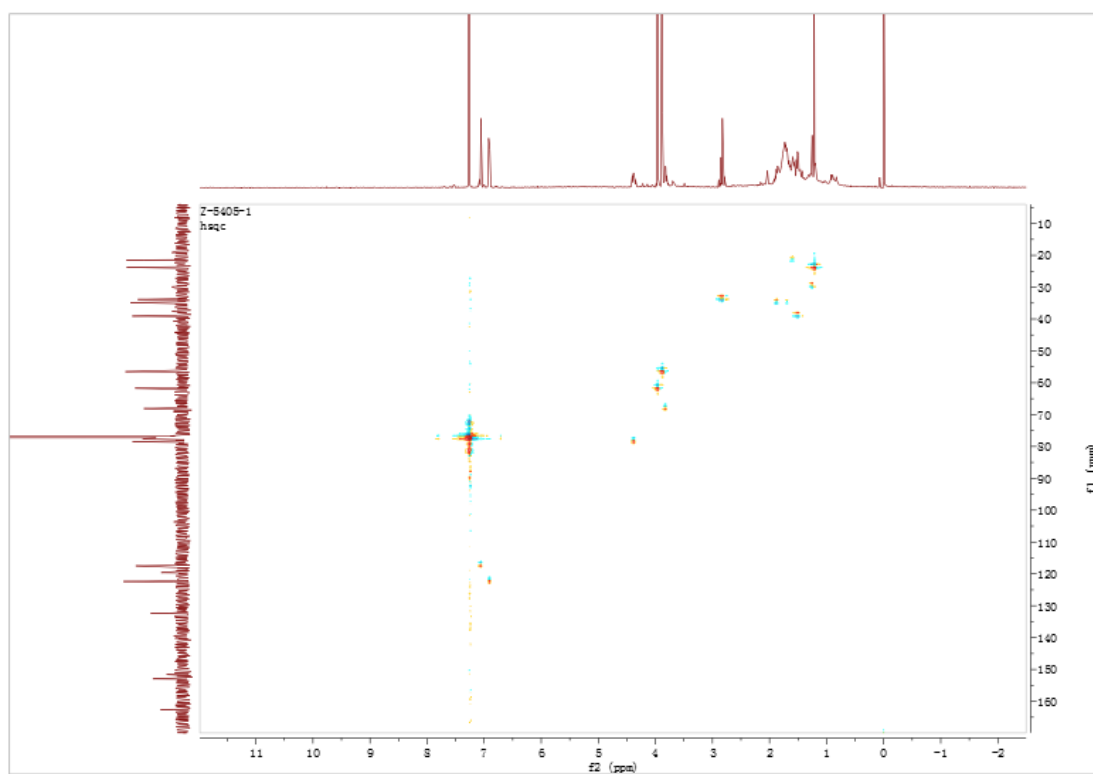

**Figure S25.** HMQC spectrum of **4** in CDCl<sub>3</sub>

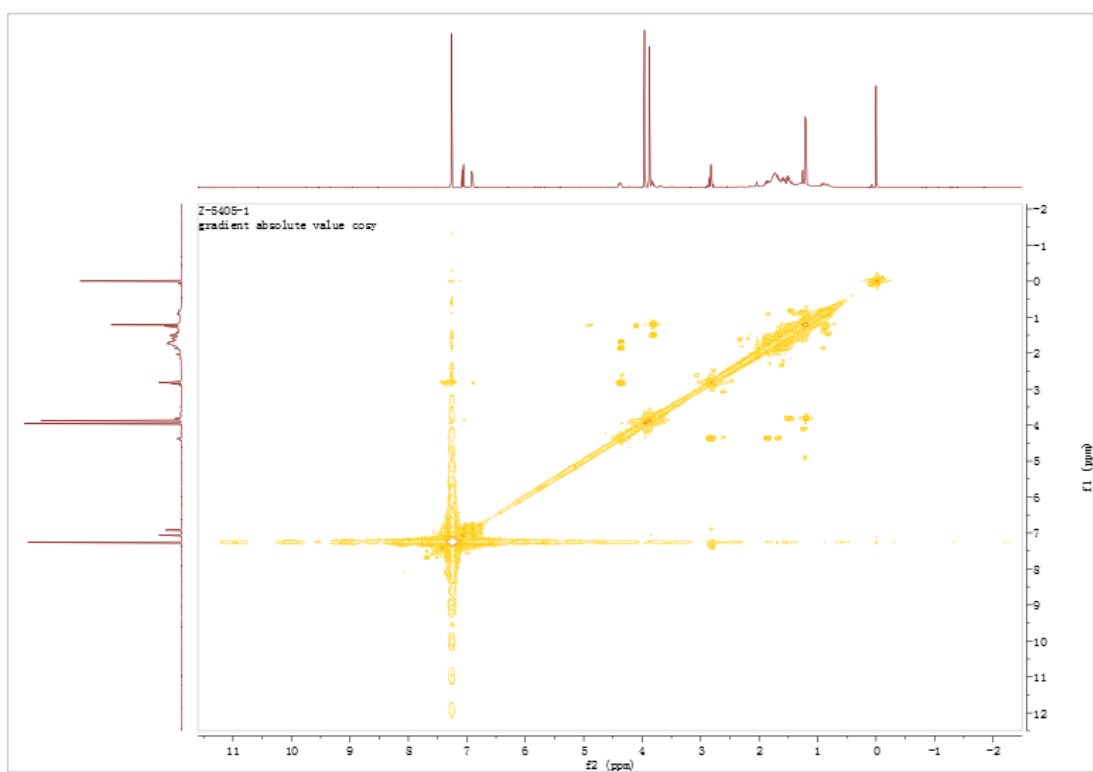

**Figure S26.** <sup>1</sup>H-<sup>1</sup>H COSY spectrum of **4** in CDCl<sub>3</sub>



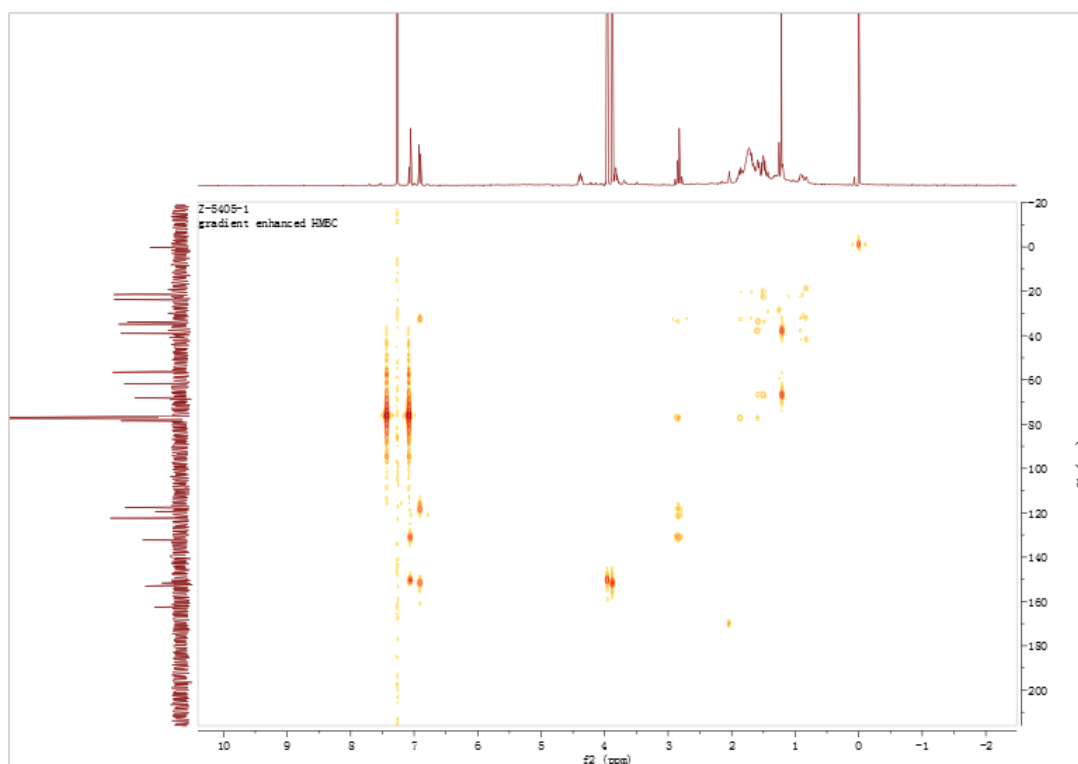

**Figure S27.** HMBC spectrum of **4** in  $\text{CDCl}_3$

20201210-3-Z-5405-1 #1 RT: 0.00 AV: 1 NL: 1.51E7  
T: FTMS + p ESI Full ms [200.0000-400.0000]

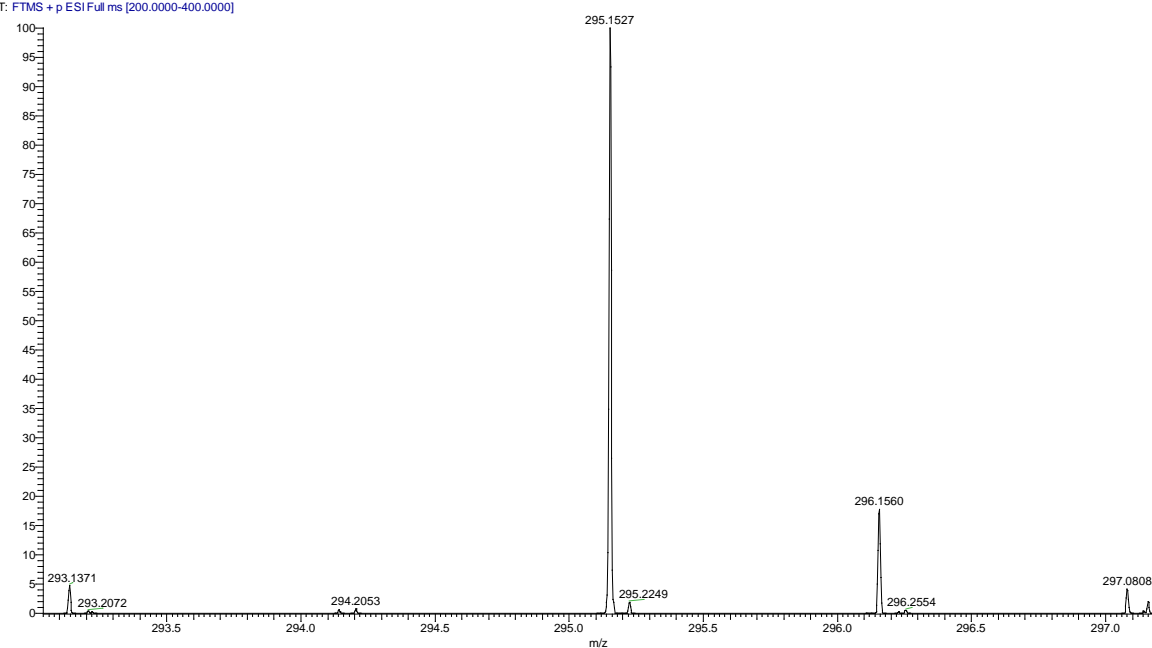

**Figure S28.** HR-ESI-MS spectrum of **4**

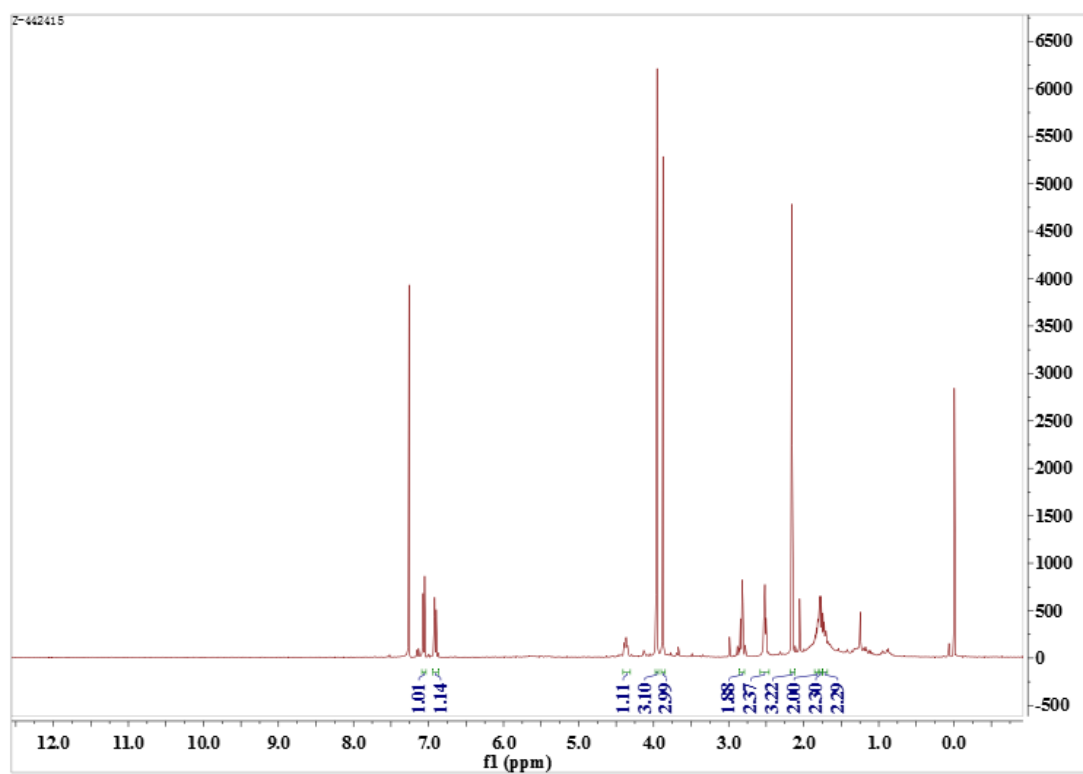

**Figure S29.** <sup>1</sup>H NMR spectrum of **5** in CDCl<sub>3</sub>

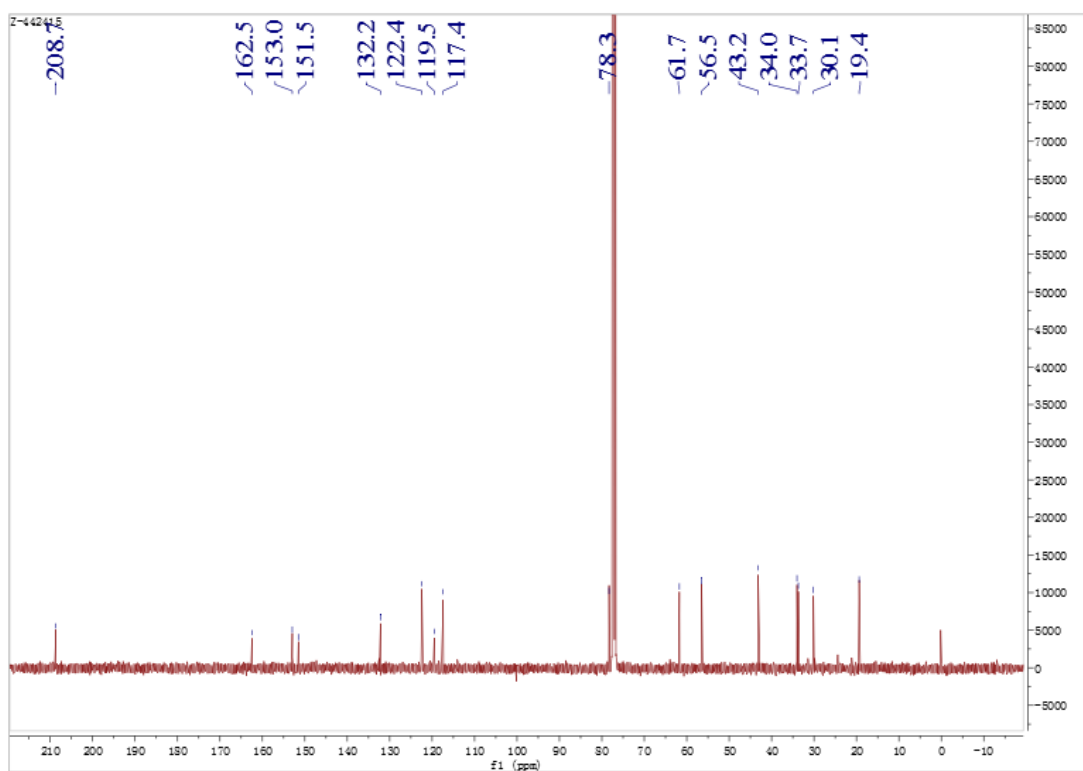

**Figure S30.** <sup>13</sup>C NMR spectrum of **5** in CDCl<sub>3</sub>

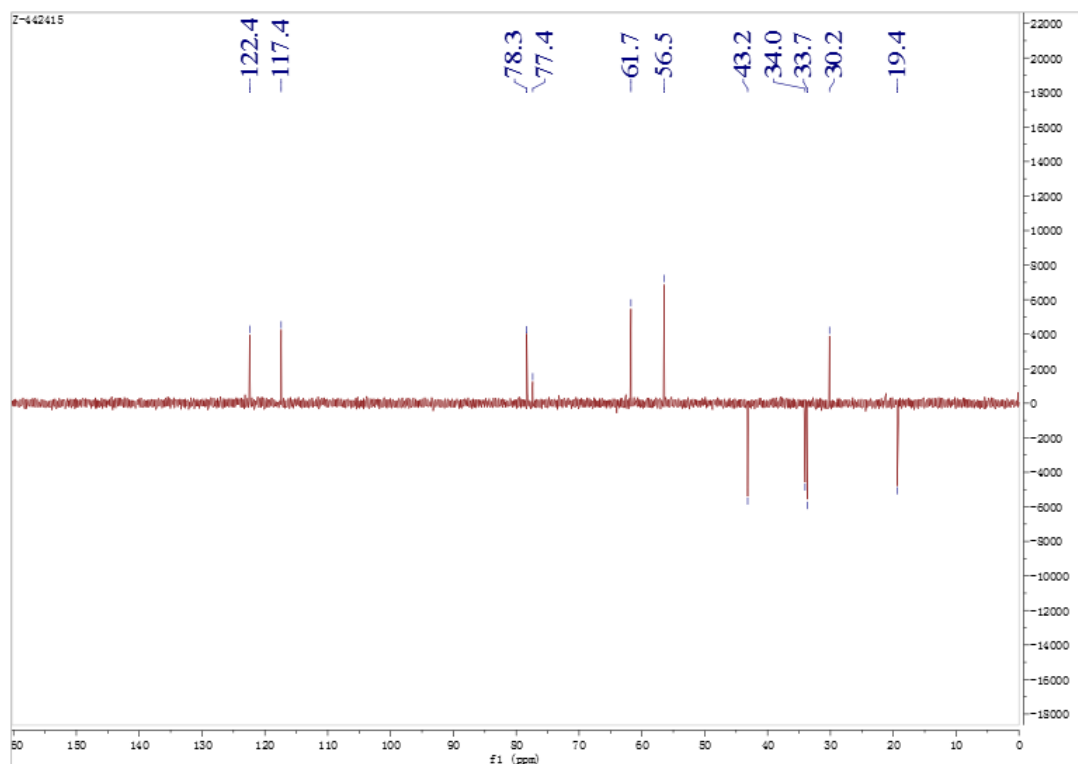

**Figure S31.**  $^{135}\text{-DEPT}$  spectrum of **5** in  $\text{CDCl}_3$

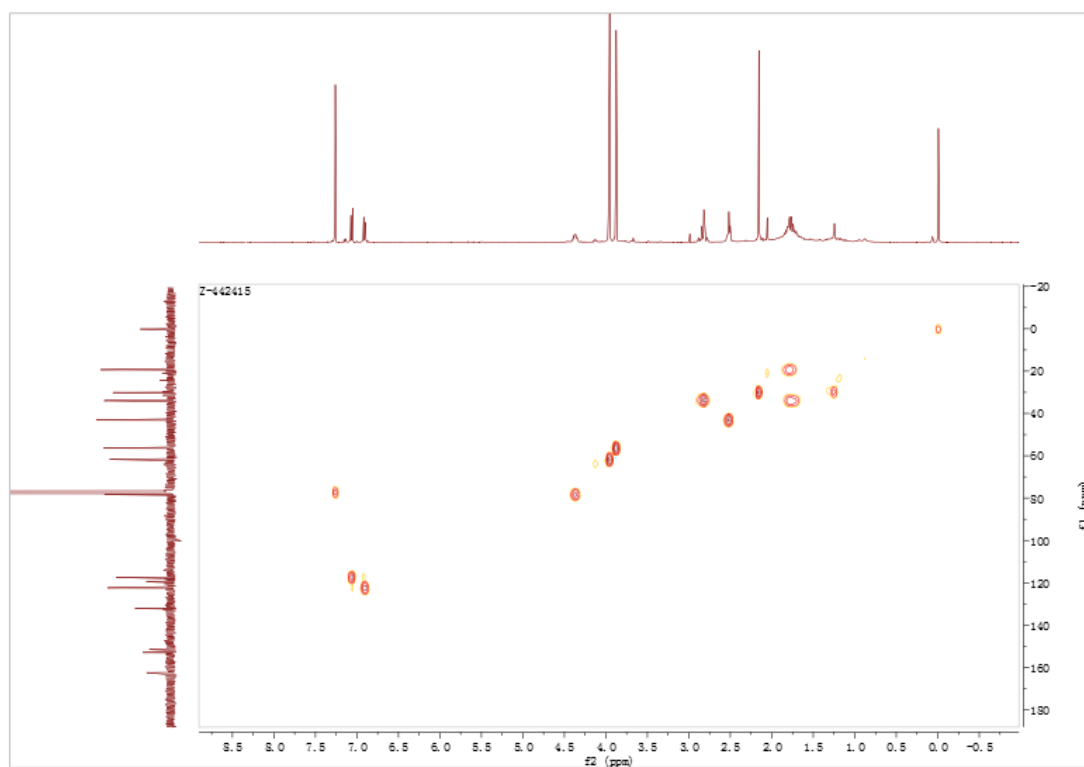

**Figure S32.** HMQC spectrum of **5** in  $\text{CDCl}_3$

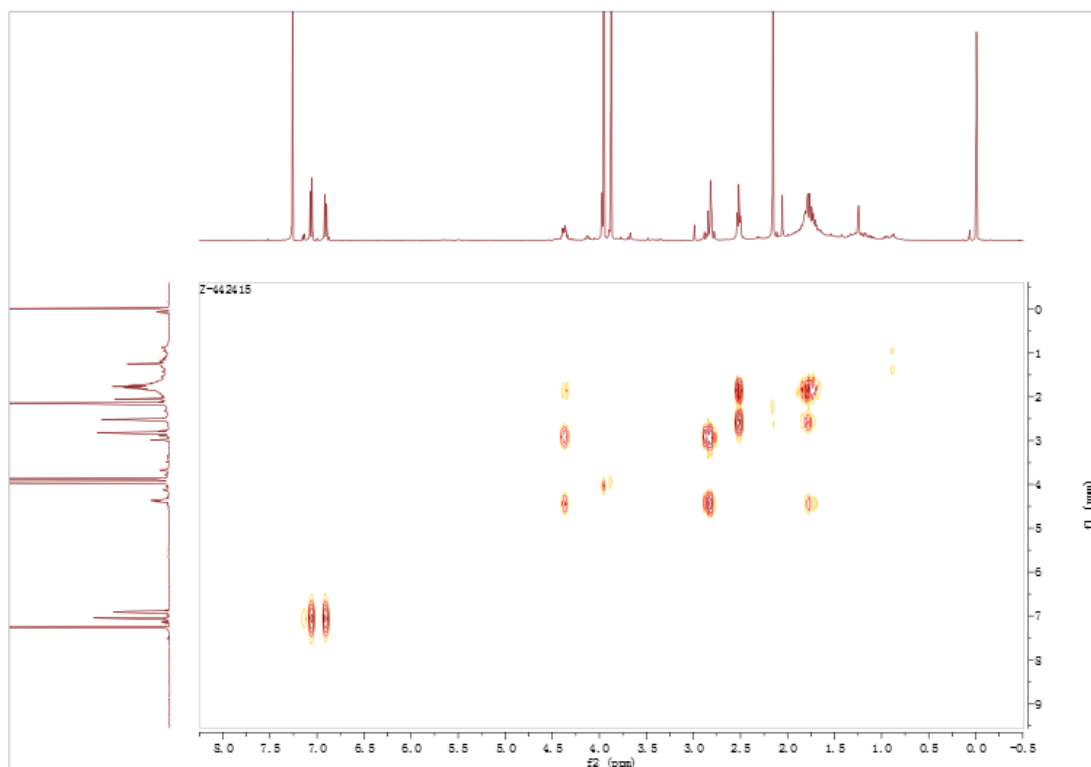

**Figure S33.**  $^1\text{H}$ - $^1\text{H}$  COSY spectrum of **5** in  $\text{CDCl}_3$

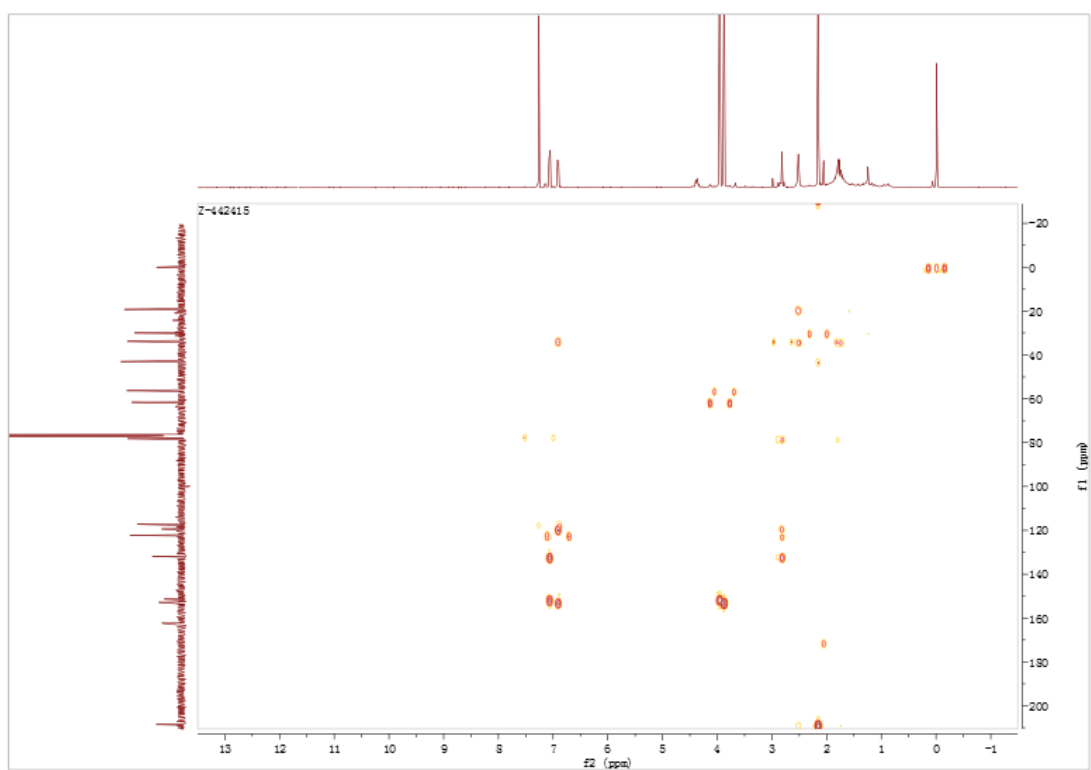

**Figure S34.** HMBC spectrum of **5** in  $\text{CDCl}_3$

20201210-5-Z-442415 #1 RT: 0.00 AV: 1 NL: 1.93E8  
T: FTMS + p ESI Full ms [170.0000-430.0000]

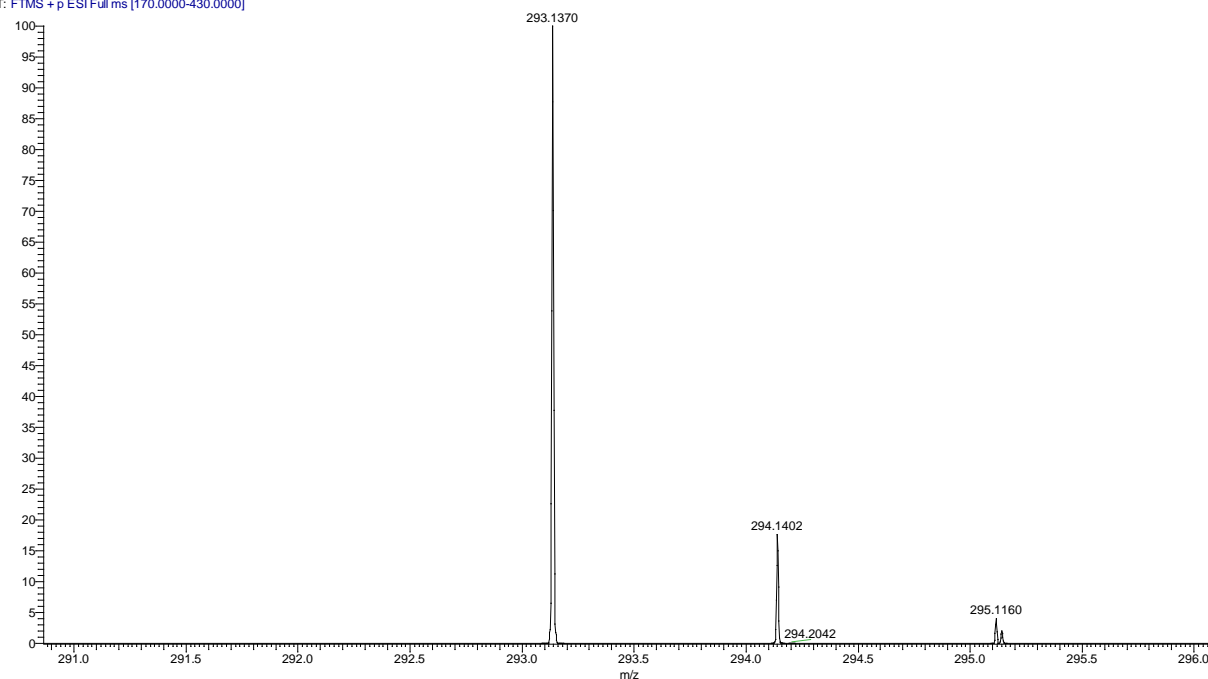

**Figure S35.** HR-ESI-MS spectrum of **5**

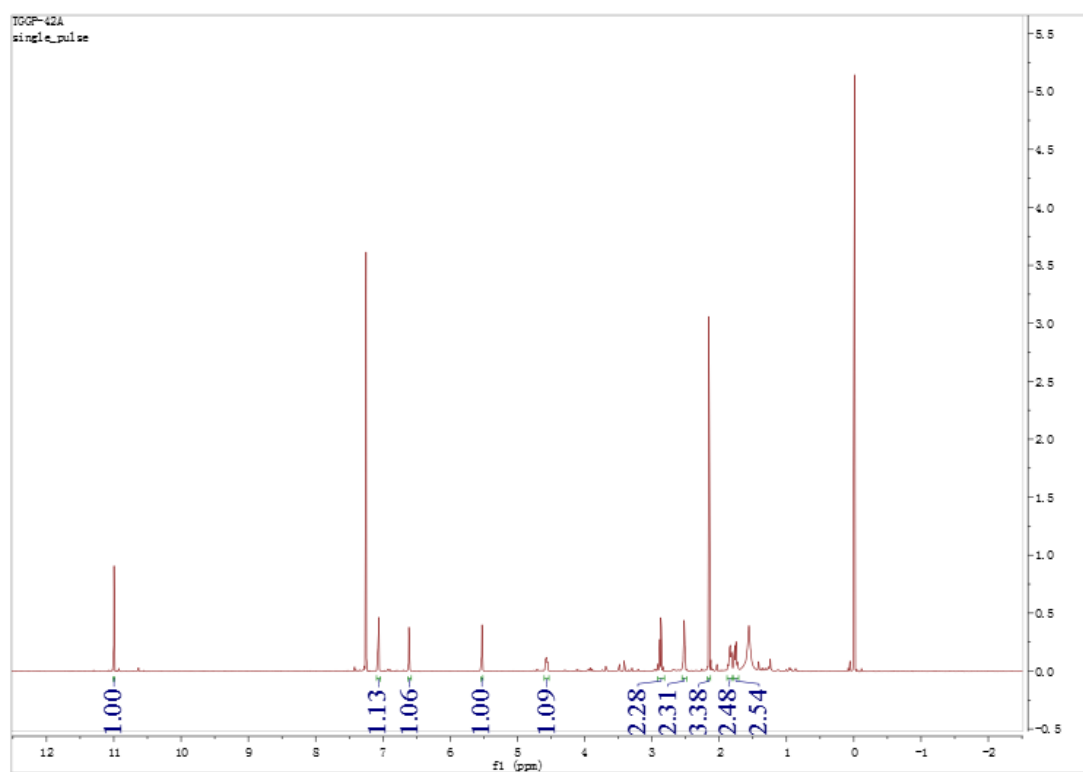

**Figure S36.** <sup>1</sup>H NMR spectrum of **6** in CDCl<sub>3</sub>

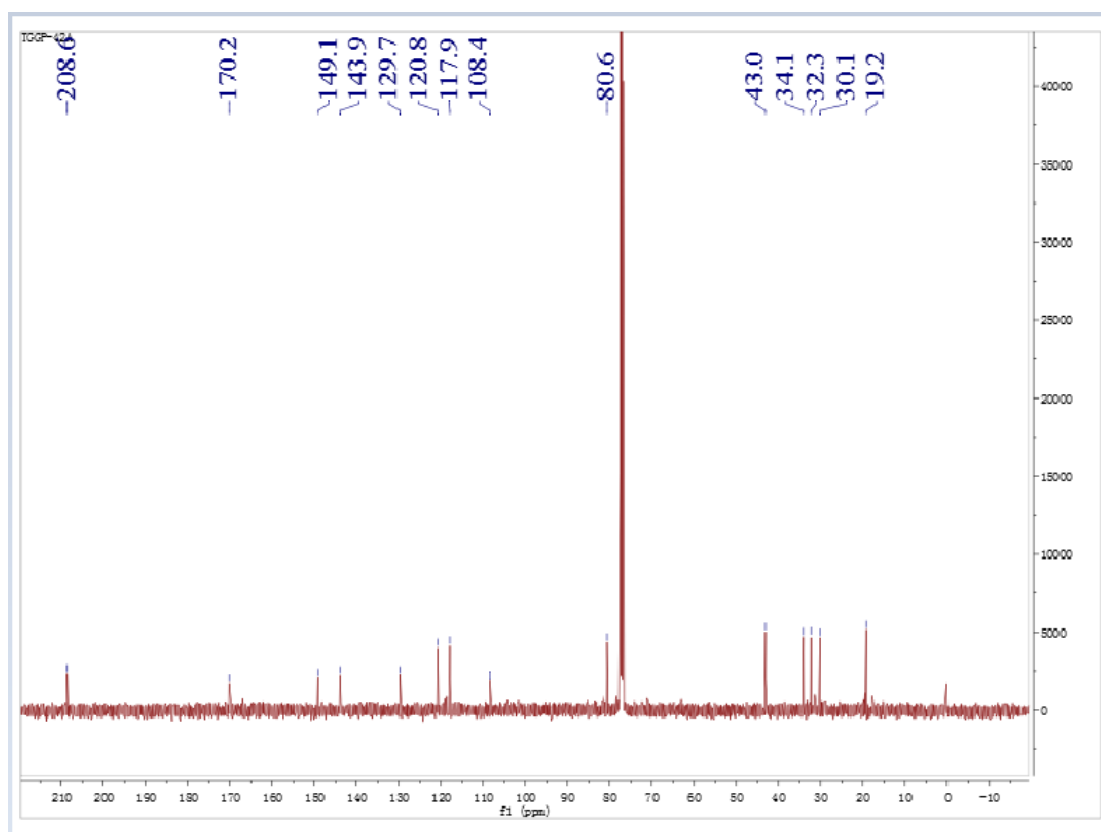

Figure S37. <sup>13</sup>C NMR spectrum of 6 in CDCl<sub>3</sub>

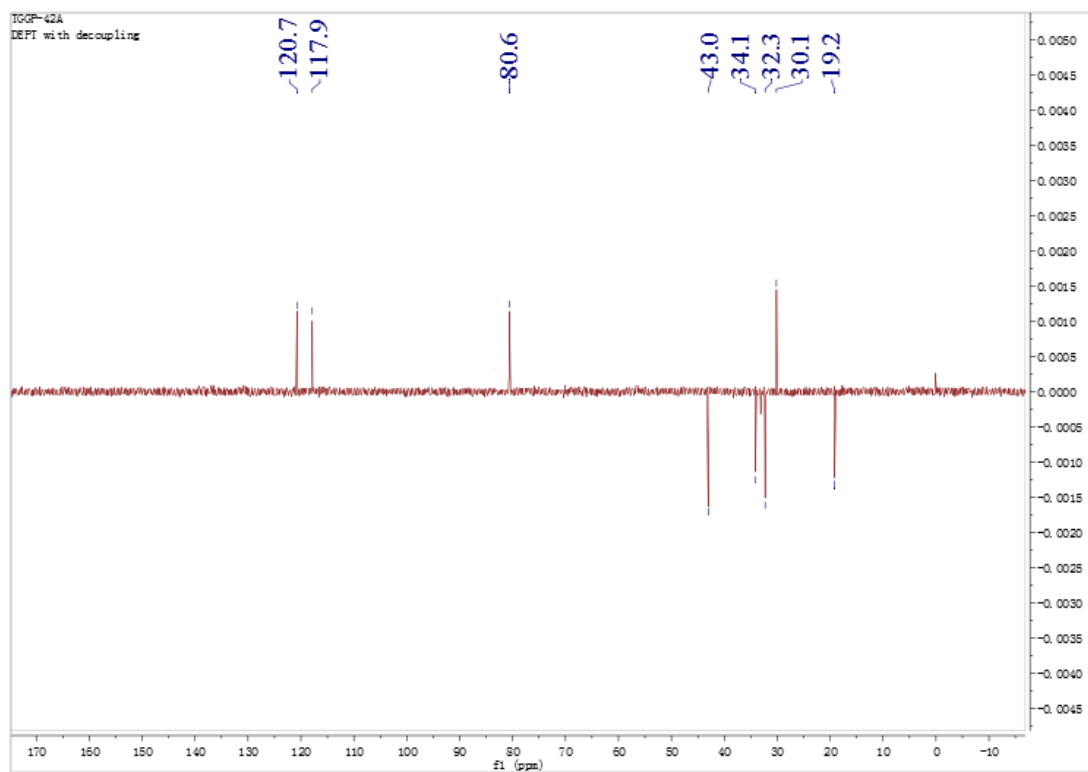

Figure S38. <sup>135</sup>-DEPT spectrum of 6 in CDCl<sub>3</sub>

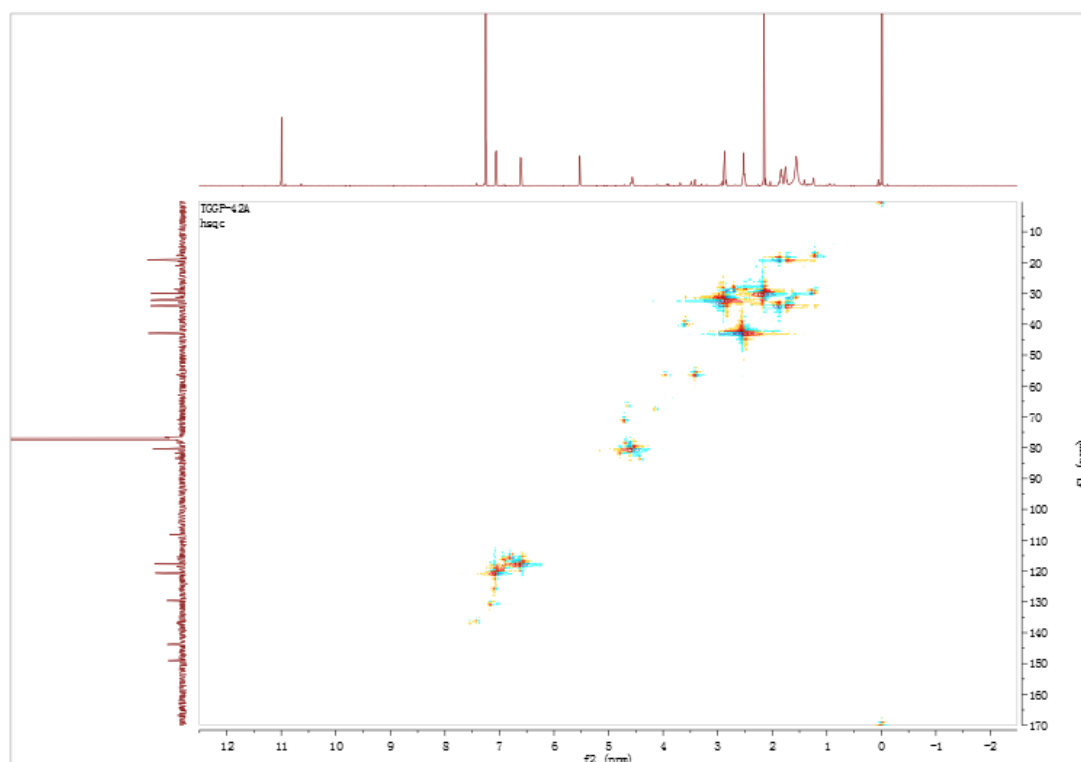

**Figure S39.** HMQC spectrum of **6** in  $\text{CDCl}_3$

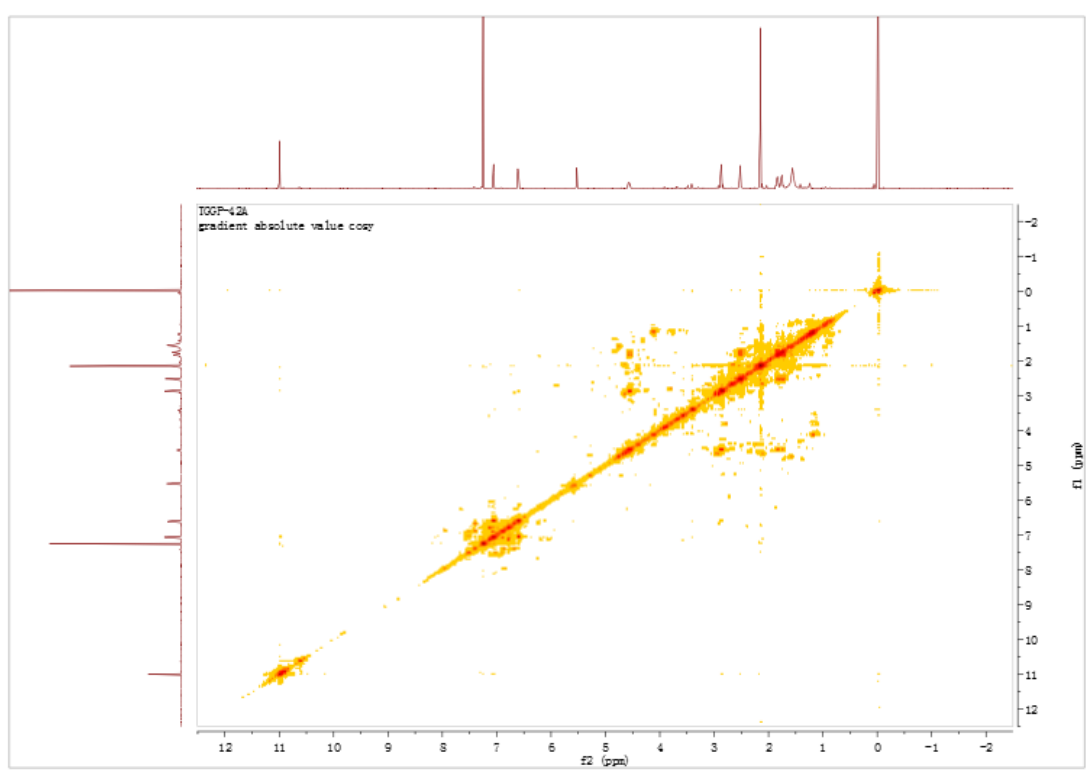

**Figure S40.**  $^1\text{H}$ - $^1\text{H}$  COSY spectrum of **6** in  $\text{CDCl}_3$

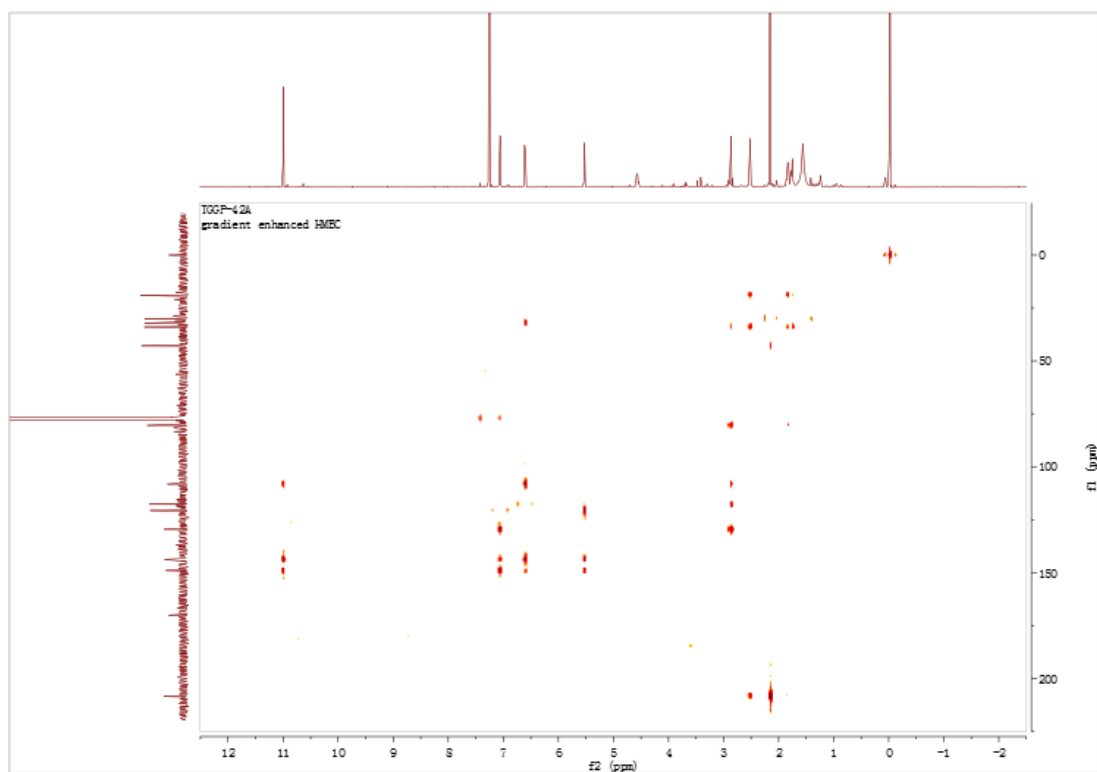

**Figure S41.** HMBC spectrum of **6** in  $\text{CDCl}_3$

20201230-1-TGPP-42A+ #1 RT: 0.00 AV: 1 NL: 9.95E5  
T: FTMS + p ESI Full ms [178.0000-378.0000]

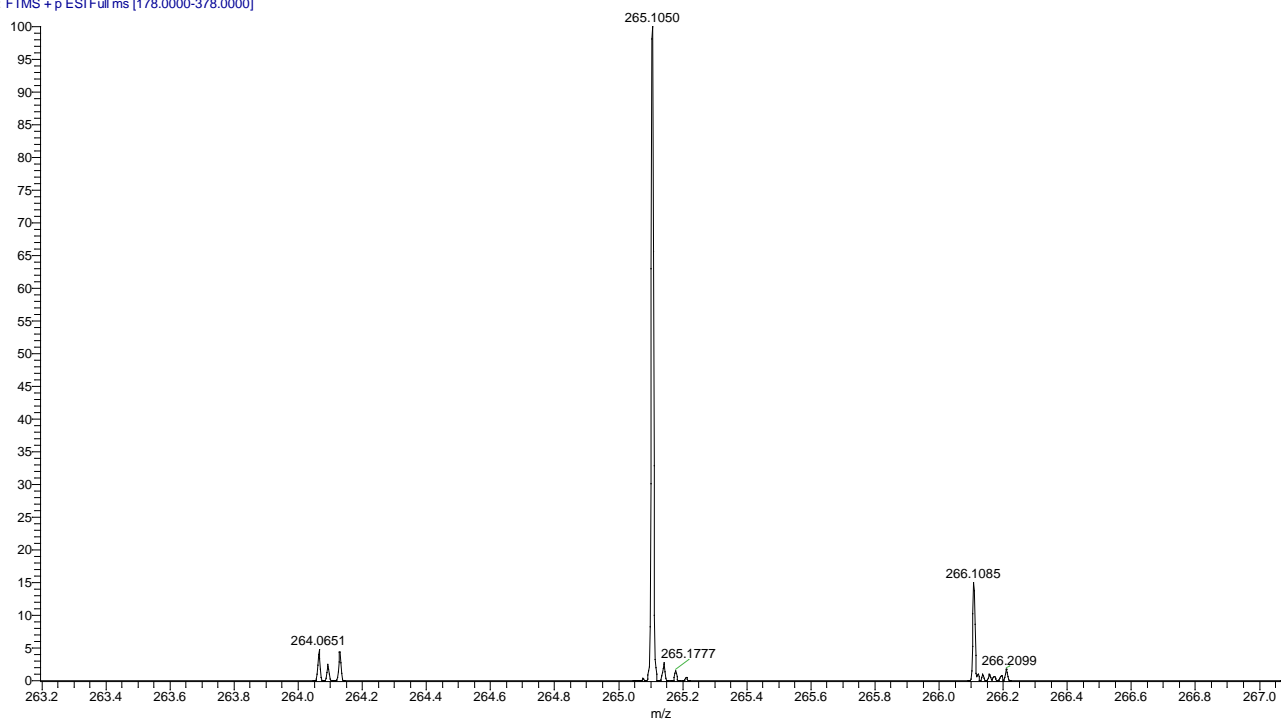

**Figure S42.** HR-ESI-MS spectrum of **6**



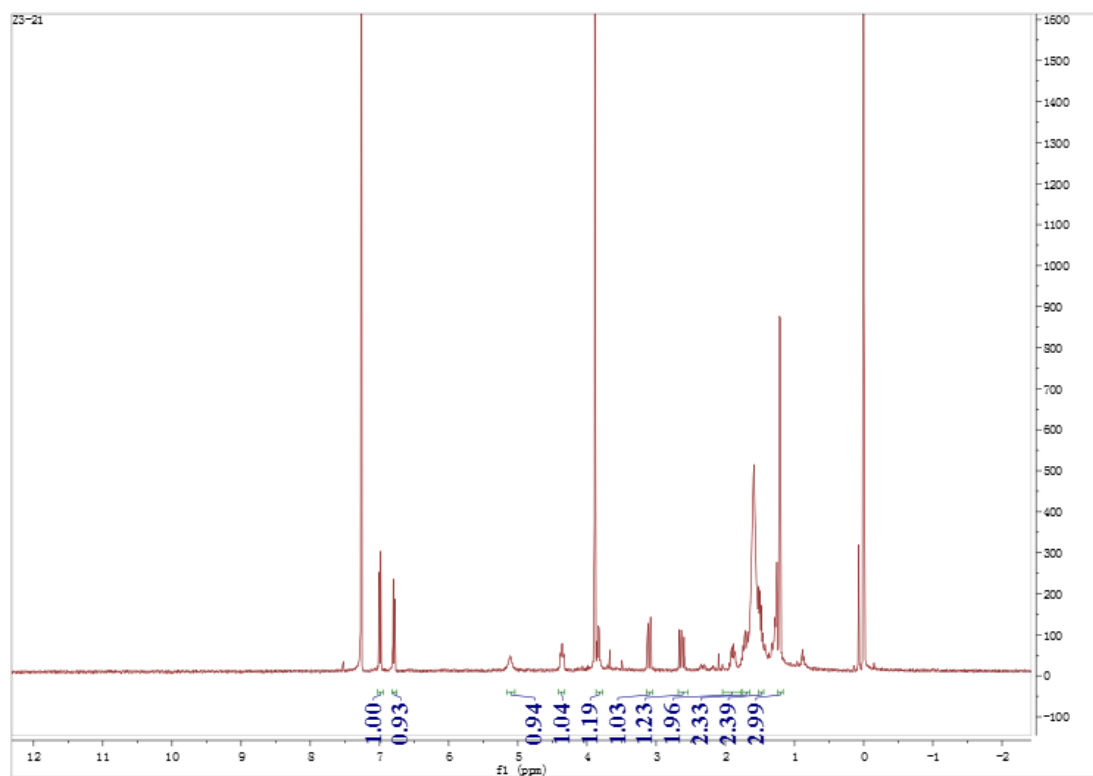

Figure S43. <sup>1</sup>H NMR (CDCl<sub>3</sub>, 400 MHz) of Hydrolysate of **1** (**1a**)

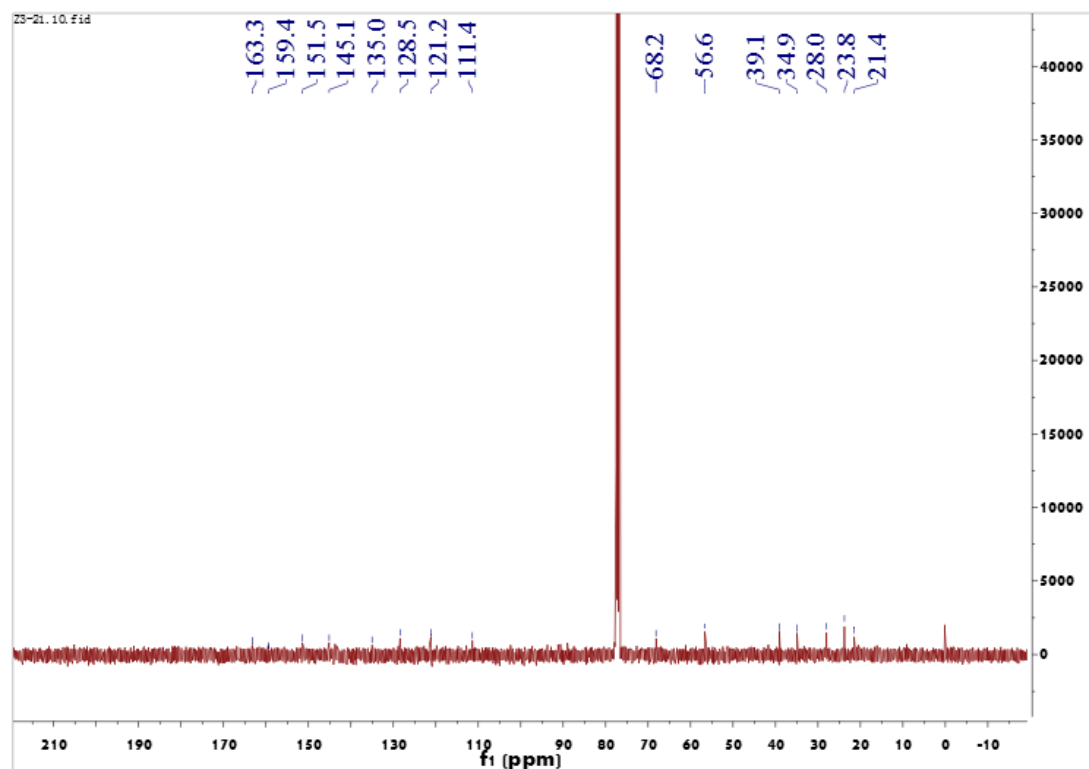

Figure S44. <sup>13</sup>C NMR (CDCl<sub>3</sub>, 400 MHz) of Hydrolysate of **1** (**1a**)

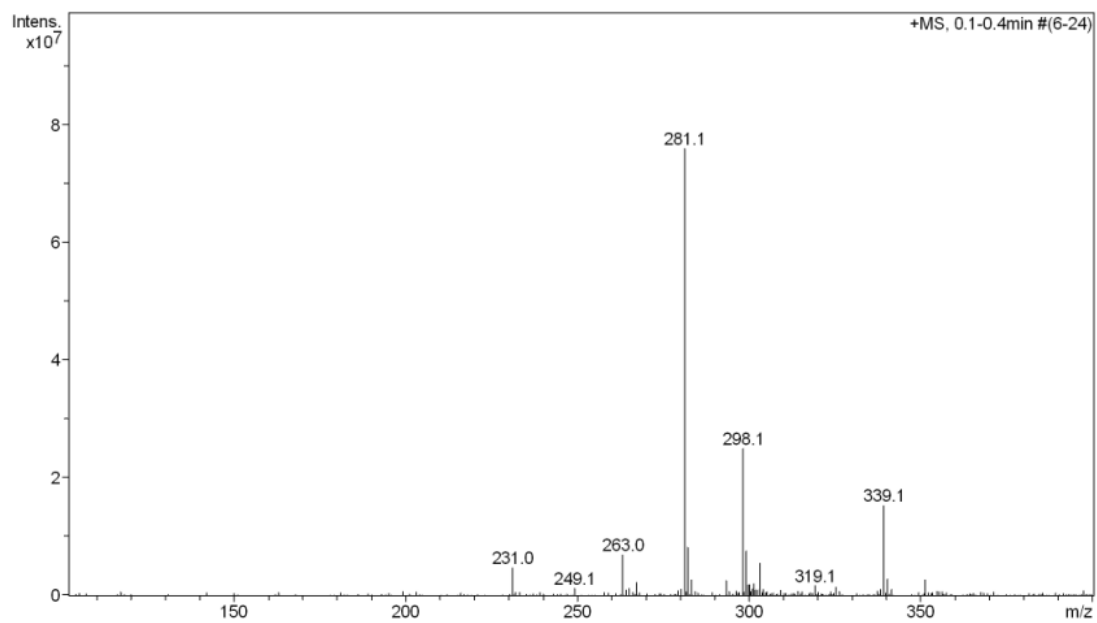

Figure S45. ESI-MS spectrum of **1a**

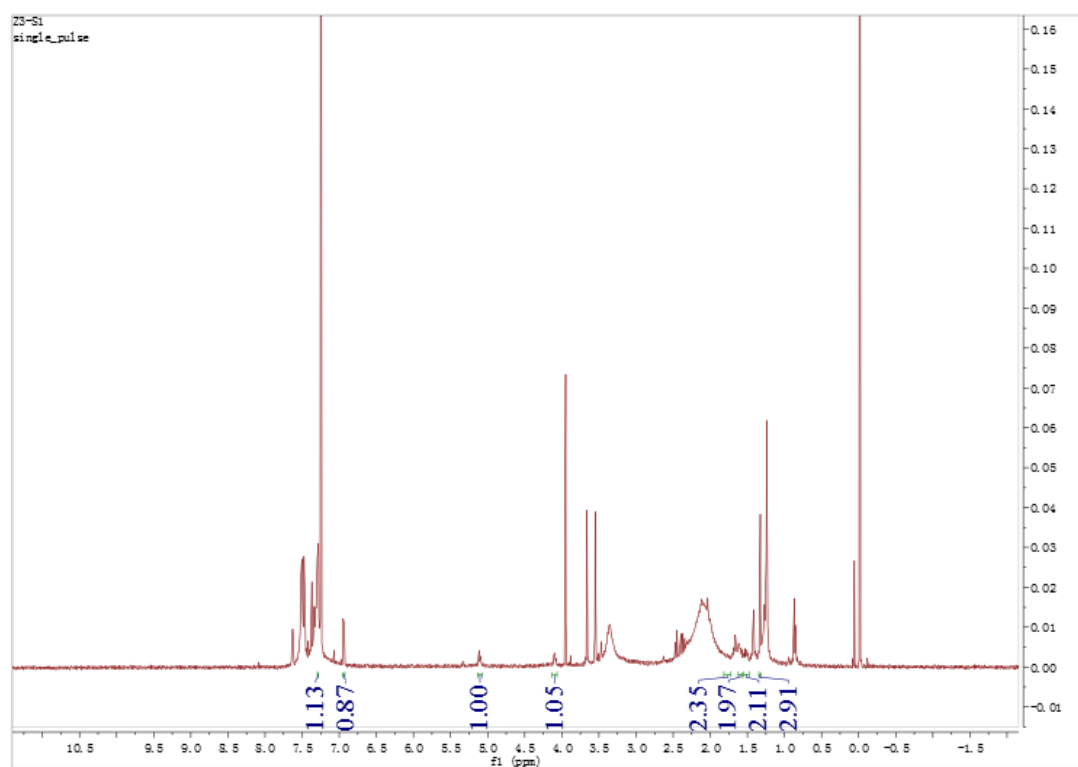

Figure S46.  $^1\text{H}$  NMR ( $\text{CDCl}_3$ , 600 MHz) of *S*-MTPA ester of **1** (**1b**)

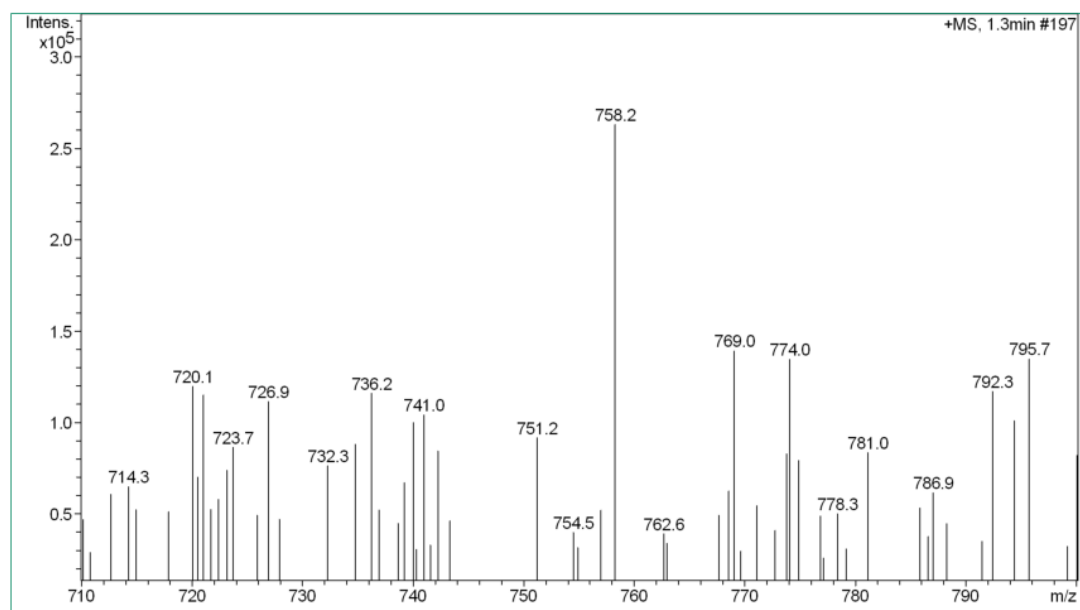

Figure S47. ESI-MS spectrum of **1b**

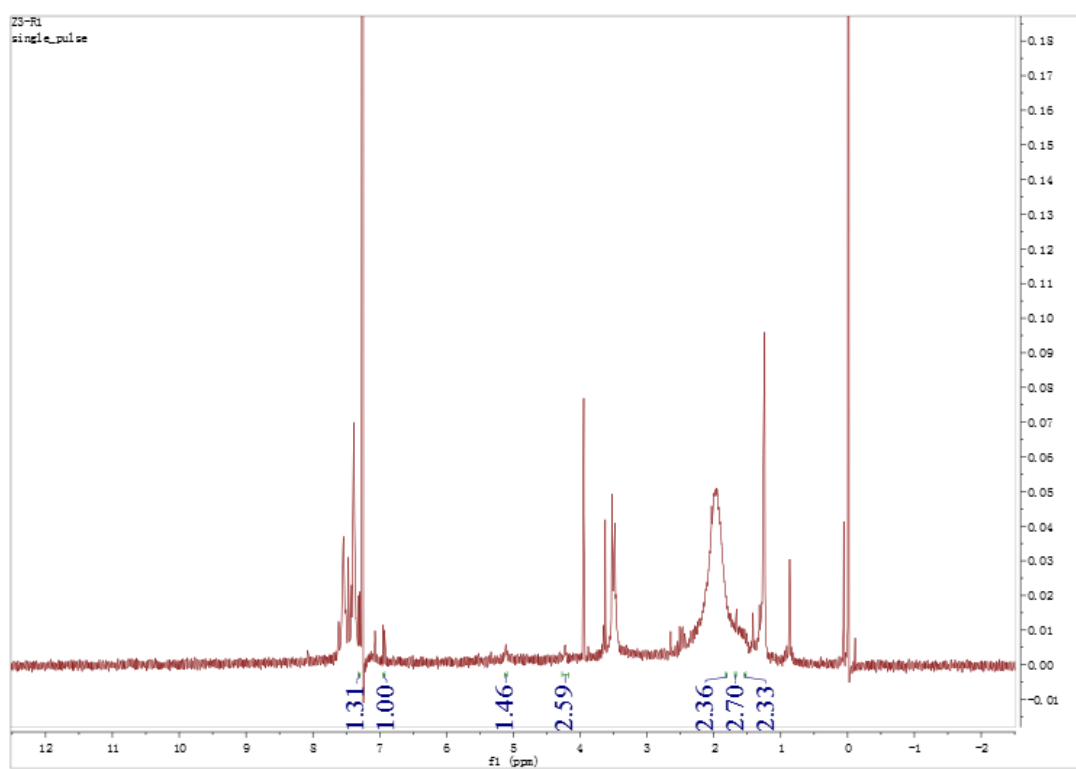

Figure S48.  $^1\text{H}$  NMR ( $\text{CDCl}_3$ , 600 MHz) of *R*-MTPA ester of **1** (**1c**)

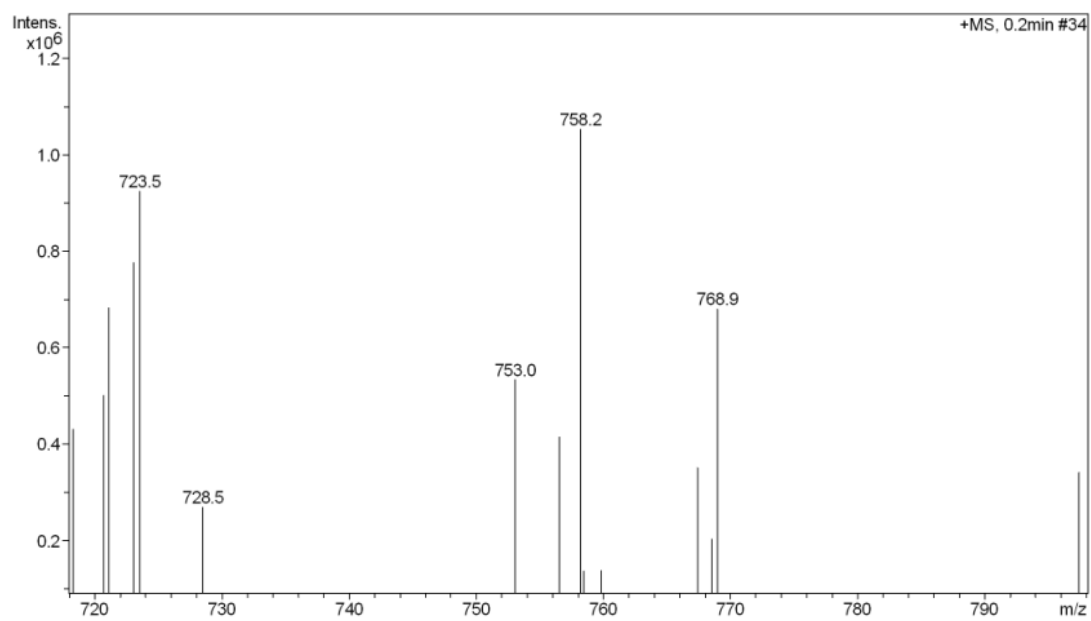

Figure S49. ESI-MS spectrum of **1c**

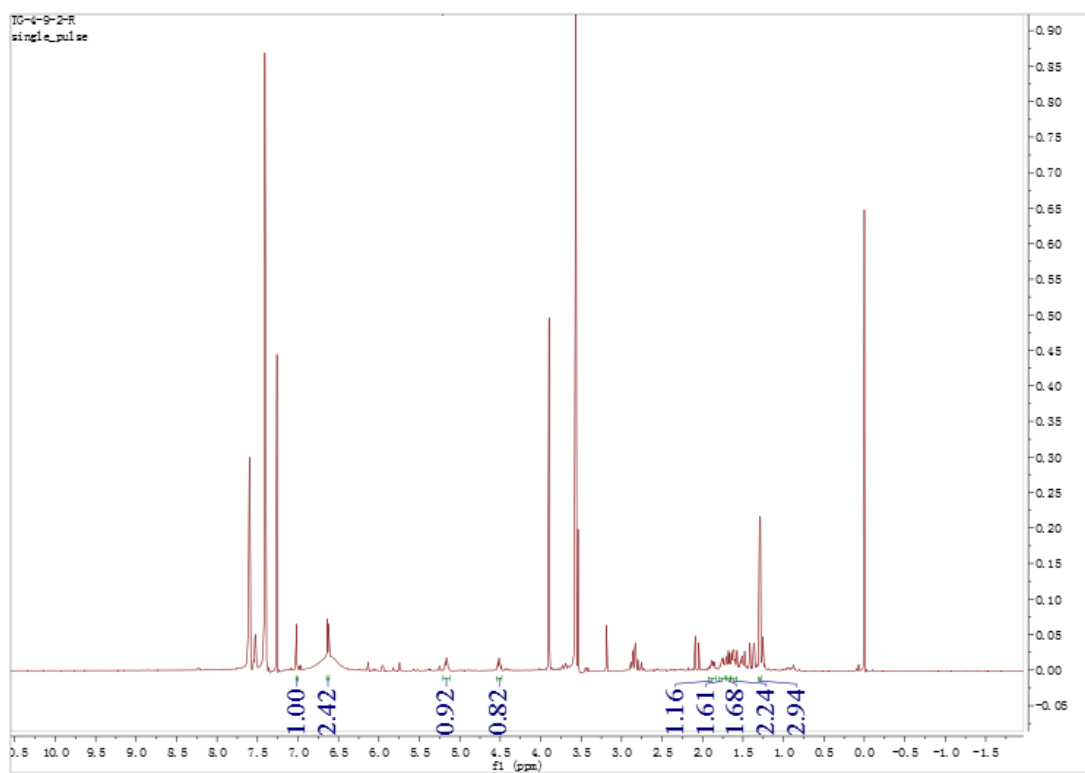

Figure S50.  $^1\text{H}$  NMR ( $\text{CDCl}_3$ , 600 MHz) of *S*-MTPA ester of **2** (**2a**)

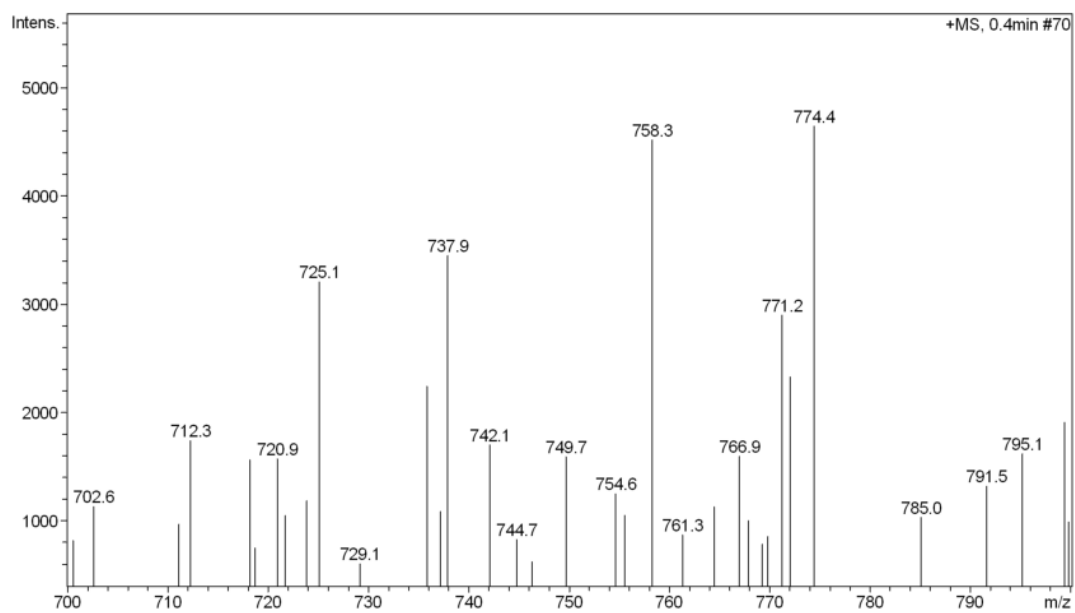

Figure S51. ESI-MS spectrum of **2a**

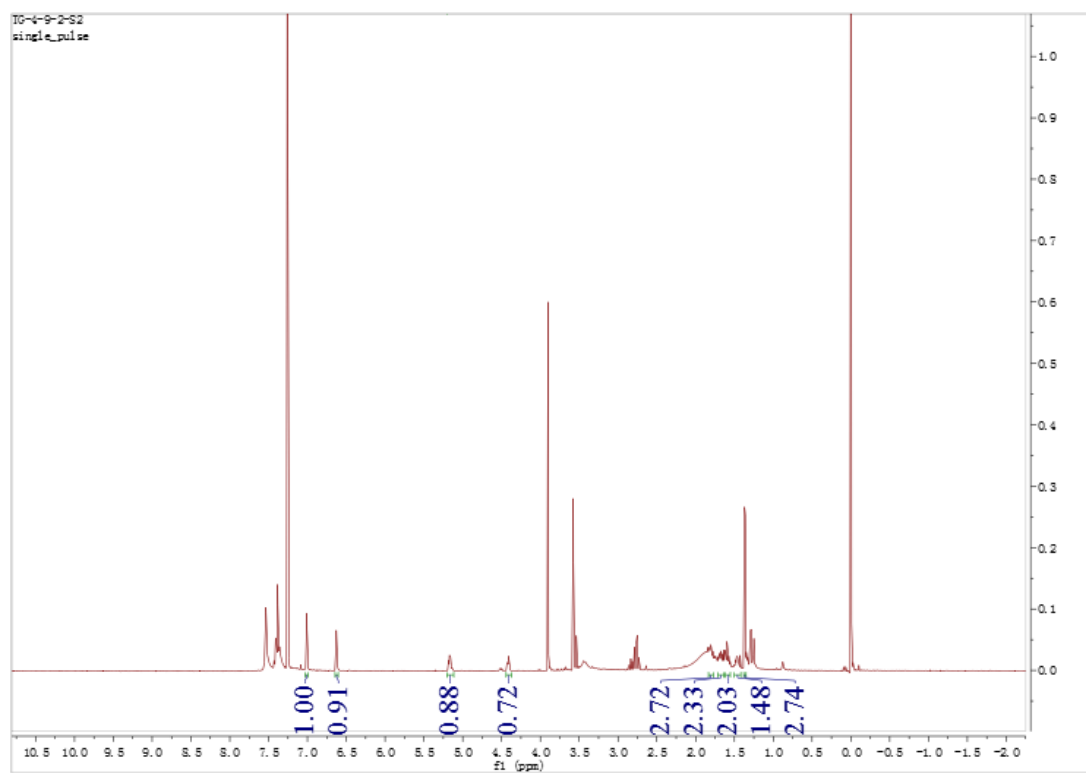

Figure S52. <sup>1</sup>H NMR (CDCl<sub>3</sub>, 600 MHz) of *R*-MTPA ester of **2** (**2b**)

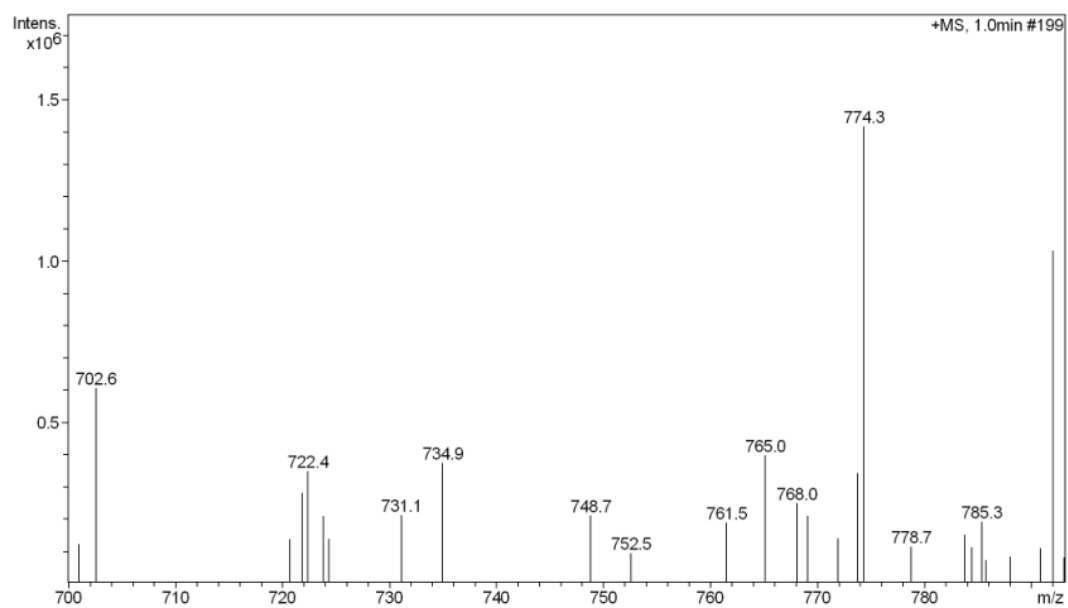

Figure S53. ESI-MS spectrum of **2a**

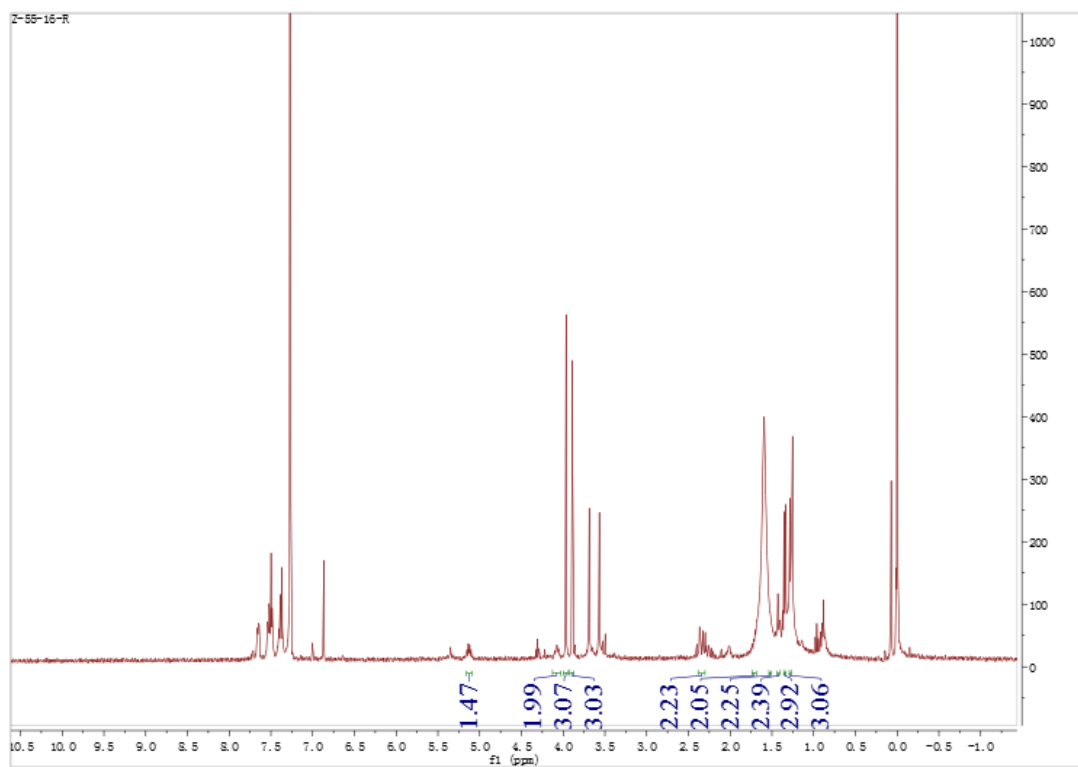

Figure S54.  $^1\text{H}$  NMR ( $\text{CDCl}_3$ , 400 MHz) of *S*-MTPA ester of **3** (**3a**)

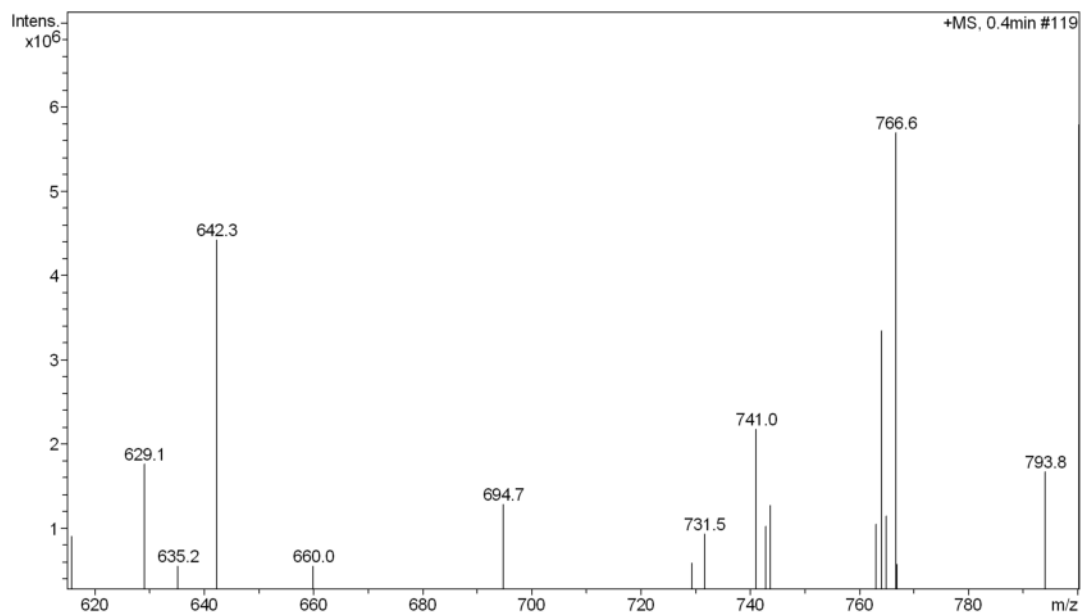

Figure S55. ESI-MS spectrum of **3a**

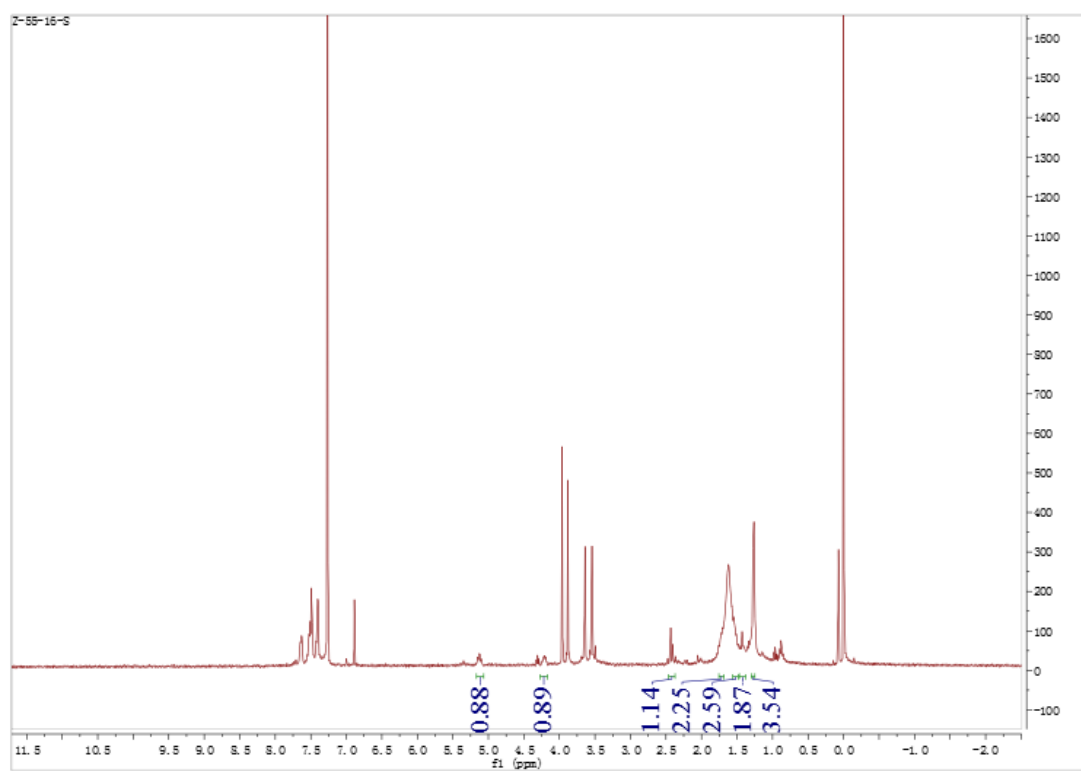

Figure S56. <sup>1</sup>H NMR (CDCl<sub>3</sub>, 400 MHz) of *R*-MTPA ester of **3** (**3b**)

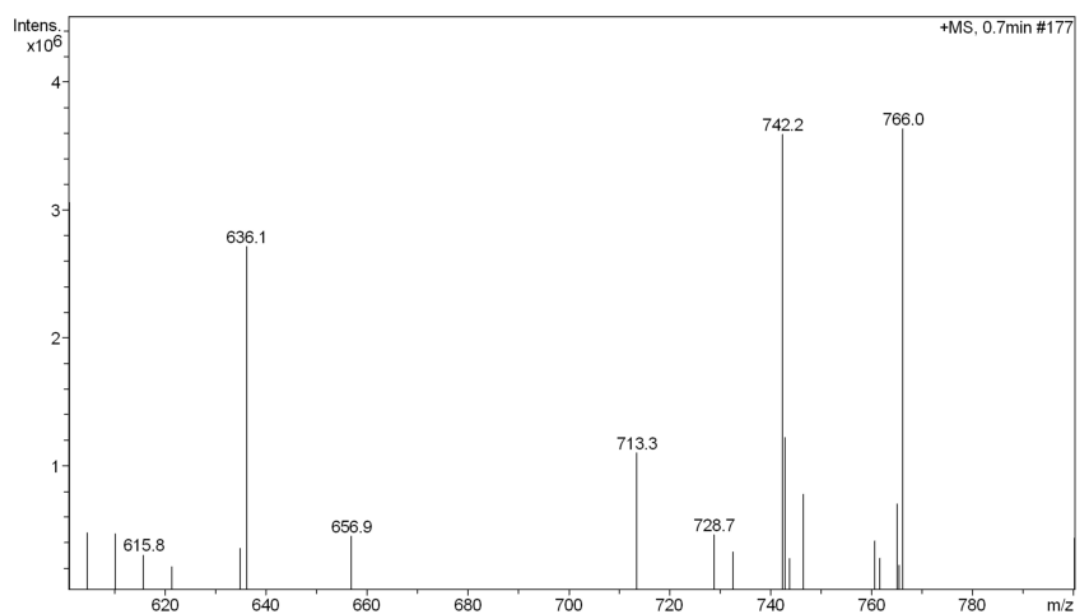

Figure S57. ESI-MS spectrum of **3b**
